1 Original Research Article

2 **Stoichiometry of two plant glycine decarboxylase complexes and comparison**  
3 **with a cyanobacterial glycine cleavage system**

4 Maria Wittmiß<sup>1</sup>, Stefan Mikkat<sup>2</sup>, Martin Hagemann<sup>1</sup>, and Hermann Bauwe<sup>1,\*</sup>

5 <sup>1</sup> Department of Plant Physiology, University of Rostock, Albert-Einstein-Straße 3, D-18059  
6 Rostock, Germany

7 <sup>2</sup> Core Facility Proteome Analysis, Rostock University Medical Center, Schilling-Allee 69, D-  
8 18057 Rostock, Germany

9

10 **Correspondence:** Hermann Bauwe, University of Rostock, Department of Plant Physiology,  
11 Albert-Einstein-Straße 3, D-18059 Rostock, Germany.

12 hermann.bauwe@uni-rostock.de;

13

14 **E-Mail:** Maria Wittmiß, maria.wittmiss@web.de;

15 Stefan Mikkat, stefan.mikkat@med.uni-rostock.de;

16 Martin Hagemann, martin.hagemann@uni-rostock.de.

17

18 **Footnote:** Maria Wittmiß and Stefan Mikkat contributed equally to this work.

19

20 **Material Distribution Footnote:** The author responsible for distribution of materials integral  
21 to the findings presented in this article is: Hermann Bauwe (hermann.bauwe@uni-rostock.de).

22

23 **Running Title:** Glycine Cleavage System of Plants and Cyanobacteria

24

25 **Word Count:** 6056 (Introduction to Acknowledgements)

26 **ABSTRACT**

27 The multienzyme glycine cleavage system (GCS) converts glycine and tetrahydrofolate to the  
28 one-carbon compound 5,10-methylenetetrahydrofolate, which is of vital importance for most if  
29 not all organisms. Photorespiring plant mitochondria contain very high levels of GCS proteins  
30 organised as a fragile glycine decarboxylase complex (GDC). The aim of this study is to  
31 provide mass spectrometry-based stoichiometric data for the plant leaf GDC and examine  
32 whether complex formation could be a general property of the GCS in photosynthesizing  
33 organisms. The molar ratios of the leaf GDC component proteins are 1L<sub>2</sub>-4P<sub>2</sub>-8T-26H and 1L<sub>2</sub>-  
34 4P<sub>2</sub>-8T-20H for pea and Arabidopsis, respectively, as determined by mass spectrometry. The  
35 minimum mass of the plant leaf GDC ranges from 1,550-1,650 kDa, which is larger than  
36 previously assumed. The Arabidopsis GDC contains four times more of the isoforms GCS-P1  
37 and GCS-L1 in comparison with GCS-P2 and GCS-L2, respectively, whereas the H-isoproteins  
38 GCS-H1 and GCS-H3 are fully redundant as indicated by their about equal amounts. Isoform  
39 GCS-H2 is not present in leaf mitochondria. In the cyanobacterium *Synechocystis* sp. PCC  
40 6803, GCS proteins are present at low concentration but above the complex formation  
41 threshold reported for pea leaf GDC. Indeed, formation of a cyanobacterial GDC from the  
42 individual recombinant GCS proteins *in vitro* could be demonstrated. Presence and metabolic  
43 significance of a *Synechocystis* GDC *in vivo* remain to be examined but could involve  
44 multimers of the GCS H-protein that dynamically crosslink the three GCS enzyme proteins,  
45 facilitating glycine metabolism by the formation of multienzyme metabolic complexes.

46

47 **Key words:** glycine cleavage system, glycine decarboxylase complex, multienzyme metabolic  
48 complexes, one-carbon metabolism, photorespiration, recombinant enzymes, *Synechocystis*.

## 49 INTRODUCTION

50 The oxidation of glycine is vitally important for plants and most other organisms because it  
51 provides one-carbon-units to a large number of biosynthetic pathways (Engel *et al.*, 2007,  
52 Kikuchi *et al.*, 2008). The biochemical process requires three enzymes acting sequentially to  
53 produce 5,10-methylenetetrahydrofolate from glycine and tetrahydrofolate (THF; Figure 1).  
54 The three enzymes are the pyridoxal 5'-phosphate (PLP)-dependent P-protein (glycine  
55 decarboxylase, EC 1.4.4.2), the THF-dependent T-protein (aminomethyltransferase, EC  
56 2.1.2.10), and the NAD<sup>+</sup>-dependent L-protein (dihydrolipoamide dehydrogenase, EC  
57 2.1.8.1.4). P-, T- and L-protein share a common substrate protein, the H-protein (hydrogen or  
58 aminomethyl carrier protein) carrying a covalently linked lipoyl cofactor. During the reaction  
59 cycle, the lipoyl moiety of H-protein occurs in three different forms: the dithiolane form is the  
60 oxidant during glycine decarboxylation by P-protein, the aminomethylated form links the P- to  
61 the T-protein, and a dithiol form that is generated by T-protein. The latter must be re-oxidised  
62 by L-protein before the next reaction cycle can begin. Collectively, the four proteins form the  
63 glycine cleavage system (GCS). The GCS reaction cycle is fully reversible and can produce  
64 glycine from 5,10-methylenetetrahydrofolate, CO<sub>2</sub>, NH<sub>3</sub> and NADH (Kawasaki *et al.*, 1966,  
65 Freudenberg and Andreesen, 1989). Hence, the GCS is being used in synthetic biology as a  
66 key component of the 'reductive glycine pathway' of formate and CO<sub>2</sub> assimilation in tailor-  
67 made microbial organisms for sustainable bioproduction (discussed in Bar-Even, 2016, Yishai  
68 *et al.*, 2018).

69 In eukaryotes, the GCS occurs only in the mitochondrion (Kisaki *et al.*, 1971, Motokawa  
70 and Kikuchi, 1971), closely cooperating with isoforms of SHMT located in different cellular  
71 compartments (for example, Bourguignon *et al.*, 1988) in order to provide one-carbon units  
72 and NAD(P)H for many biosynthetic pathways (for example, Mouillon *et al.*, 1999, Fan *et al.*,  
73 2014). In photosynthesizing leaf cells, the GCS is mostly engaged in serine synthesis during  
74 photorespiration (reviewed in Bauwe *et al.*, 2010). The very high flux through this pathway  
75 requires unusually large amounts of GCS proteins in the mitochondrial matrix, about 130 mg ml<sup>-1</sup>  
76 in pea leaf mitochondria (32% of total matrix protein mass), where they associate in the  
77 glycine decarboxylase complex (GDC, Neuburger *et al.*, 1986, Oliver *et al.*, 1990, Douce *et al.*,  
78 2001). It is thought that formation of the GDC gives an activity boost to the GCS reaction cycle  
79 in order to match the needs of photosynthetic-photorespiratory metabolism. The latest  
80 hypothesis on the structure of the GDC speculates that about 30 H-protein molecules could  
81 form a central core to which one dimer of L-protein, two dimers of P-protein and nine monomers  
82 of T-protein are attached (Oliver and Raman, 1995). The underlying stoichiometry was  
83 determined by enzyme-linked immunosorbent assays (ELISA) protein quantification in the  
84 crude mitochondrial matrix extract in combination with activity measurements (Oliver *et al.*,  
85 1990). By contrast to 'classical', stable multiprotein complexes, such as the 2-oxoacid

86 dehydrogenase complexes or Rubisco, the GDC disaggregates easily at low concentration.  
87 Therefore, the GDC may be rather considered a multienzyme metabolic complex similar to  
88 those identified in glycolysis and the tricarboxylic acid cycle (reviewed in Schmitt and An,  
89 2017). This view would correspond to the fact that the GCS is likewise operational at very low  
90 concentration *in vitro* and *in vivo*, for example in the mitochondria of heterotrophically cultured  
91 plant cells (about 0.18% of the mitochondrial proteome mass, Fuchs *et al.*, 2019) and animal  
92 cells as well as in prokaryotes. Information on the mitochondrial or cellular GCS concentration  
93 and hence the mode of GCS operation including a possible GDC formation in animals and  
94 prokaryotes is missing so far.

95         The objectives of this study are to examine the composition of plant GDCs by mass  
96 spectrometry technology and find out whether the potential to form a multiprotein complex is a  
97 general property of the GCS in photosynthesizing organisms. To this end, we investigated the  
98 stoichiometry and isoprotein composition of the *Arabidopsis thaliana* (*Arabidopsis*) leaf  
99 mesophyll GDC in comparison with that of *Pisum sativum* (pea) and examined whether and  
100 under which conditions recombinant GCS proteins of the cyanobacterium *Synechocystis* sp.  
101 PCC 6803 (*Synechocystis*) would be able to form a GDC.

## 102 **RESULTS**

### 103 **Pea and Arabidopsis GDC differ from one another in their H-protein contents**

104 First, by using a Hi3 shotgun proteomic approach, we confirmed the purity of the mitochondrial  
105 preparations and calculated a GDC content of ~39 mole % (~44 mass %) and an SHMT content  
106 of ~13 mole % (~14 mass%) in the matrix of *Arabidopsis* leaf mitochondria (Supplementary  
107 Table S 1), which is even higher than previous estimates for pea leaf mitochondria (~30 mass  
108 %, Oliver *et al.*, 1990, Vauclore *et al.*, 1996). The mass spectrometry-based calculation of the  
109 GDC content of pea mitochondria was not possible, because a complete protein sequence  
110 database of pea is not available.

111         In order to quantify the molar ratios in which the leaf GDC proteins are present in pea  
112 and *Arabidopsis* mitochondria, we next designed an artificial protein comprising a  
113 concatenation of proteotypic tryptic peptides (QconCAT, Pratt *et al.*, 2006; Supplementary  
114 Figure S 1). After proteolytic digestion of the isotope-labeled QconCAT with trypsin, all  
115 expected peptides were identified (Supplementary Figure S 2) and showed a linear response  
116 with increasing concentration. Using total soluble mitochondrial matrix proteins spiked with the  
117 QconCAT, molar ratios of about 1L<sub>2</sub>-4P<sub>2</sub>-8T-26H and 1L<sub>2</sub>-4P<sub>2</sub>-8T-20H were calculated for pea  
118 and *Arabidopsis*, respectively (Figure 2). Comparable stoichiometries were obtained using  
119 isotope-labeled synthetic peptides, which however failed to quantify the P-protein, and label-  
120 free Hi3 quantification, which underestimated the amount of the H-proteins.

121 The P-protein, L-protein and H-protein are encoded by two (P and L) and three gene  
122 copies (H) each in the Arabidopsis genome (Bauwe and Kolukisaoglu, 2003), but the relative  
123 contribution of the respective isoforms to GCS activity and GDC formation is not known. Our  
124 QconCAT-based or label-free approaches were designed to determine the GDC protein  
125 isoform ratios in Arabidopsis leaf mesophyll mitochondria (Figure 3). The H-protein isoforms  
126 GCS-H1 (At2g35370) and GCS-H3 (At1g32470) are present in similar amounts, whereas the  
127 H-protein isoform GCS-H2 (At2g35120) was virtually absent. By contrast, P-protein and L-  
128 protein are mostly, each to about 80%, represented by the isoforms GCS-P1 (At4g33010) and  
129 mtLPD1 (At1g48030). The far most abundant mitochondrial SHMT is SHMT1 (At4g37930).  
130 The very low level of SHMT2 (At5g26780), which normally does not occur in mitochondria of  
131 photosynthesizing leaf cells but dominates in those of heterotrophic cells (Engel *et al.*, 2011,  
132 Fuchs *et al.*, 2019), indicates that preparations of leaf mesophyll mitochondria are inevitably  
133 contaminated by small amounts of mitochondria originating from other leaf tissues, such as  
134 the vasculature.

### 135 **The GCS concentration in *Synechocystis* cells could allow formation of a GDC**

136 To our knowledge, GCS protein contents were only determined for pea leaf mitochondria so  
137 far (for example, Oliver *et al.*, 1990). During this study, data for heterotrophically grown  
138 Arabidopsis cells were published (Fuchs *et al.*, 2019). It was therefore important to likewise  
139 assess the abundance of GCS proteins and their relative molar ratios in a non-plant organism.  
140 To this end, we identified and quantified all proteins involved in the GCS and the pyruvate  
141 dehydrogenase complex (PDC; Table 1) in *Synechocystis* Hi3 LC-MS datasets generated  
142 earlier in our laboratory (Gärtner *et al.*, 2019). The GCS proteins, unsurprisingly, are much less  
143 abundant in *Synechocystis* than they are in photorespiring mitochondria, which however  
144 implies that a considerable fraction of L-protein is unavailable for the GCS because it is bound  
145 to the PDC. This fraction was assessed on the assumption that the mean content of the two  
146 *Synechocystis* PDC E1 alpha and E1 beta subunits equals the amount of L-protein bound to  
147 prokaryotic PDC (Patel *et al.*, 2014). Hence, within the limits of the Hi3 technique, it appears  
148 that the L-, P-, T- and H-protein are present in a molar ratio of approximately  $1L_2-0.5P_2-0.6T-$   
149  $2.4H$  in *Synechocystis* cells and collectively represent at least ~0.051 mole %, corresponding  
150 to ~0.07% mass % of the total protein. With a protein content of roughly 300 mg ml<sup>-1</sup> for  
151 *Synechocystis* (Jahn *et al.*, 2018), this value corresponds to about 0.2 mg ml<sup>-1</sup> total GCS  
152 protein, which is distinctly above the pea leaf GDC dissociation threshold of about 0.08 mg ml<sup>-1</sup>  
153 determined by (Oliver *et al.*, 1990).

### 154 **Recombinant *Synechocystis* GCS proteins**

155 In order to study interactions between *Synechocystis* GCS proteins that go beyond enzyme-  
156 substrate interactions it was necessary to produce appropriate amounts of pure recombinant

157 proteins. We have earlier reported the production and properties of recombinant *Synechocystis*  
158 P- and H-protein in *E. coli* (Hasse *et al.*, 2007, Hasse *et al.*, 2013). For our present study, we  
159 additionally developed overexpression protocols for the T- and the L-protein. The  
160 overexpressed proteins were first purified by IMAC and then further purified and quality  
161 checked by size-exclusion chromatography (SEC) and SDS-PAGE, respectively (Figure 4).  
162 During SEC in the low-ion-strength GCS buffer, the P-protein eluted at about the calculated  
163 dimeric size of ~200 kDa (Figure 4), whereas the dimeric L-protein showed an somewhat  
164 higher than predicted apparent size of ~150 kDa. The H-protein eluted in this buffer as a  
165 multimer with an apparent size of ~75-80 kDa, possibly a tetramer. This pattern changed in a  
166 buffer containing 50 mM NaCl, in which the P- and L- protein eluted somewhat earlier and the  
167 H-protein tetramers dissociated to form dimers. Full lipoylation of the H-protein was confirmed  
168 by using native PAGE, which separates the lipoylated holoprotein from the apoprotein. Similar  
169 to the native T-protein from other sources (Cohen-Addad *et al.*, 1997, Guilhaudis *et al.*, 2000),  
170 the *Synechocystis* T-protein forms insoluble aggregates within a few hours after purification  
171 when overexpressed alone but remains in solution when co-expressed together with H-protein.  
172 The formed complex eluted from the SEC column with an apparent size of ~100 kDa in the  
173 GCS buffer, possibly corresponding to a TH<sub>4</sub> complex. The interaction between the two  
174 proteins was weaker in the high-salt buffer, in which a smaller, likely TH<sub>2</sub> complex eluted at ~75  
175 kDa followed by the H-protein dimer at ~35 kDa.

176 Specific maximum activities were  $0.37 \pm 0.01 \mu\text{mol min}^{-1} \text{mg}^{-1}$  for the P-protein  
177 (bicarbonate-exchange reaction) and  $14 \mu\text{mol min}^{-1} \text{mg}^{-1}$  (with lipoic acid,  $K_m = 830 \mu\text{M}$ ) or  $3$   
178  $\mu\text{mol min}^{-1} \text{mg}^{-1}$  (with reduced H-protein,  $K_m = 7 \mu\text{M}$ ) for the L-protein. By contrast, the  
179 recombinant *Synechocystis* T-protein showed no activity, neither individually nor in the total  
180 GCS activity assay (no NADH generation, no NH<sub>3</sub> release).

### 181 **Pull-down studies show interaction between the P- and L-protein**

182 IMAC purification of the *Synechocystis* H-protein reproducibly recovered small amounts of  
183 several proteins of the overexpression host, including the *E. coli* GCS P-protein (Figure 5A),  
184 which corresponds to earlier reports that chicken and plant P- and H-protein associate to form  
185 a relatively stable P<sub>2</sub>H<sub>2</sub> (enzyme-substrate) complex (Hiraga and Kikuchi, 1980, Walker and  
186 Oliver, 1986). By contrast, neither the T-protein nor the L-protein co-purified with H-protein. In  
187 order to test whether protein-protein interactions also occur between GCS enzyme proteins,  
188 that is, beyond enzyme-substrate interactions, we used the recombinant P-protein and L-  
189 protein as baits to recover interacting proteins from a *Synechocystis* cell lysate in pull-down  
190 experiments. The results shown in Figure 5B and C demonstrate that the immobilized  
191 *Synechocystis* P-protein specifically binds to the *Synechocystis* L-protein and vice versa. Mass  
192 spectrometry showed that several other *E. coli* and *Synechocystis* proteins were also present



193 in the IMAC eluates of this reciprocal experiment including variable amounts of the  
194 *Synechocystis* H-protein. *Synechocystis* T-protein was not identified in either eluate, possibly  
195 because this particular GCS protein is mostly bound to the membranes and therefore not  
196 present in the soluble *Synechocystis* protein fraction.

### 197 ***Synechocystis* GCS proteins form a multiprotein complex at high concentration *in vitro***

198 The pea leaf GDC, which is the only GDC investigated so far, disaggregates at low and  
199 reassembles at high protein concentration (Neuburger *et al.*, 1986, Oliver *et al.*, 1990). We  
200 therefore examined whether the *Synechocystis* GCS proteins are likewise able to form a  
201 multiprotein complex at an appropriate concentration. As expected, all four individual GCS  
202 proteins with the 214 kDa P-protein dimer as the largest protein completely permeated a size-  
203 selective 300 kDa MWCO filter membrane (Figure 6A). We next mixed the four GCS proteins  
204 at a combined concentration above the level known to trigger formation of the plant GDC.  
205 Under this condition, substantial fractions (approximately 36% in total) of all four proteins were  
206 retained on the filter membrane even after three successive washes with fresh buffer,  
207 demonstrating formation of a multiprotein complex comprising all four GCS proteins (Figure  
208 6B and C). The protein composition of the retentate did not noticeably change when we added  
209 more H-protein or used the (non-lipoylated) H-apoprotein (not shown). This confirms that H-  
210 protein was not limiting in our experiments and suggests the lipoyl arm is not essential for  
211 complex formation, corresponding to the formation of rather stable H-protein tetramers as  
212 shown in Figure 4. The cyanobacterial 'GDC' forms rapidly, even without preincubation before  
213 MWCO filtration (Figure 6B), but complex formation requires distinctly more than 10 minutes  
214 to approach equilibrium (Figure 6D). Whilst complex formation has an absolute requirement  
215 for T-protein (Figure 6E), L-protein is not necessary for the formation of a less stable P-T-H  
216 complex larger than 300 kDa (Figure 6F). Uncalibrated densitometric scans from seven SDS-  
217 PAGE patterns (independent experiments with different protein preparations) indicate an  
218 approximate molar GCS protein ratio in the retentate of 1L<sub>2</sub>-0.25P<sub>2</sub>-3T-26H (Figure 6G).

## 219 **DISCUSSION**

### 220 **New and variable stoichiometry of the plant GDC**

221 It was early suggested that the four GCS proteins might interact with each other, beyond simple  
222 enzyme-substrate interactions, to form a rather unstable complex *in vitro* (for example, Hiraga  
223 *et al.*, 1972) but it was not known whether this feature has any physiological significance. Later,  
224 such a GDC could be isolated from the matrix of pea leaf mitochondria by cautious disruption  
225 followed by 300 kDa MWCO filtration, demonstrating for plant leaves that nearly all GCS  
226 proteins are bound in a stable complex *in organello* (Neuburger *et al.*, 1986, Oliver *et al.*, 1990).  
227 This breakthrough was possible because pea leaf mitochondria contain very large amounts of

228 GCS proteins (~30% w/w, ~130 mg ml<sup>-1</sup>; Oliver *et al.*, 1990, Vauclare *et al.*, 1996). This  
229 previous estimate is close to the GCS concentration of approximately ~44% (w/w) in the  
230 Arabidopsis mitochondrial matrix that we determined from Hi3 data (Supplementary Table S  
231 1). At a crude total matrix protein concentration of 0.25 mg ml<sup>-1</sup> in vitro, corresponding to about  
232 0.08 mg ml<sup>-1</sup> (2.6 μM) total GCS proteins, the GDC dissociates into the four individual  
233 component proteins (Oliver *et al.*, 1990).

234 ELISA data from the same group suggested an approximate component ratio of the  
235 pea leaf GDC of 1L<sub>2</sub>-2P<sub>2</sub>-9T-27H (Oliver *et al.*, 1990). This is the only GDC stoichiometry  
236 reported so far, which prompted us to re-examine molar ratios for the pea GDC protein  
237 components in comparison with the Arabidopsis GDC by mass spectrometry. We did so by  
238 using three different approaches: label-free Hi3 quantification (Silva *et al.*, 2006), the QconCAT  
239 technology (Pratt *et al.*, 2006), and quantification by isotope-labeled proteotypic peptides  
240 (SpikeTides\_TQL, Schnatbaum *et al.*, 2011). The QconCAT technology produced the most  
241 comprehensive data with calculated molar ratios of about 1L<sub>2</sub>-4P<sub>2</sub>-8T-26H and 1L<sub>2</sub>-4P<sub>2</sub>-8T-20H  
242 for pea and Arabidopsis, respectively, which except the twofold higher P-protein content in our  
243 data is close to the ELISA results reported by Oliver *et al.* (1990) mentioned above. The  
244 minimum mass of a multiprotein GDC of this composition would be 1,550-1,650 kDa. The  
245 different H-protein contents are remarkable insofar as they suggest the GDC's stoichiometry  
246 may vary between species; however, such hypothesis would assume all GCS proteins are  
247 GDC-bound in photorespiring mitochondria. It is interesting to note that the above  
248 stoichiometry likewise does not very well correspond to a recent study, which suggests a 4P<sub>2</sub>-  
249 26T-25H ratio in heterotrophically grown Arabidopsis cells (Fuchs *et al.*, 2019). A possible  
250 reason for the difference between plant species and photorespiring versus heterotrophic cells  
251 could be coexistence of complexed and freely diffusing GCS proteins, particularly at  
252 concentrations close to the GDC association/dissociation threshold.

253 Data obtained by using the other two techniques corroborated this stoichiometry,  
254 despite the specific methodical difficulties that P-protein could not be quantified by using the  
255 isotope-labeled synthetic peptide and H-protein was underestimated by the label-free Hi3  
256 quantification. The latter effect was not unexpected because of the small number of H-protein  
257 tryptic peptides (Supplementary Figure S 3) that can be used to calculate the average  
258 abundance of the three most intense peptide signals in the Hi3 approach. It shall be noted that  
259 the GDC L-protein was slightly overestimated in Oliver *et al.* (1990) and our present  
260 experiments, because L-protein is also a component of 2-oxoacid decarboxylase complexes,  
261 such as the PDC (Bourguignon *et al.*, 1996). PDC however binds only about 12% of total  
262 mitochondrial L-protein as calculated from the Hi3 shotgun proteomics data (Supplementary  
263 Table S 1, assuming one PDC-E3 per five PDC-E1 subunits). Therefore, a correction of the  
264 above plant GDC stoichiometries for the mitochondrial PDC L-protein is not needed at this



265 stage and additionally would be difficult because the subunit stoichiometry of plant leaf mtPDC  
266 is not yet exactly known (Mooney *et al.*, 2002, Patel *et al.*, 2014).

267 We next determined relative contributions of the different protein isoforms to the  
268 Arabidopsis GDC and the cooperating enzyme SHMT. These results were highly consistent in  
269 comparison of the QconCAT-based and label-free approaches (Figure 3). P-protein and L-  
270 protein are mostly, each to about 80%, represented by the isoforms GCS-P1 (At4g33010) and  
271 mtLPD1 (At1g48030). In case of the L-protein, this supports earlier studies using other  
272 techniques (Luethy *et al.*, 2001, Lutziger and Oliver, 2001). The H-protein isoforms GCS-H1  
273 (At2g35370) and GCS-H3 (At1g32470) are present in about equal amounts, suggesting they  
274 are functionally redundant. GCS-H2 (At2g35120) was not detected in leaf mitochondria. This  
275 protein is exceptional because it shares only limited (about 60%) identity with GCS-H1 and  
276 GCS-H3 and is the only H-protein expressed in Arabidopsis roots and essential for seed  
277 development and maybe other processes (Bauwe, 2018, and unpublished data). SHMT1  
278 (At4g37930) could well be the only SHMT in mesophyll mitochondria because the second  
279 mitochondrial isoform, SHMT2 (At5g26780) cannot be imported (Engel *et al.*, 2011). The very  
280 small fraction of this isoform hence indicates that leaf mitochondria preparations are mostly  
281 mesophyll mitochondria although they inevitably also contain small amounts of mitochondria  
282 originating from other leaf tissues, such as the vascular bundle and others.

### 283 **Is there a GDC in cyanobacteria?**

284 By contrast to the very high concentration of GCS proteins in leaf mitochondria, heterotrophic  
285 plant cells and organs, and cyanobacteria contain much less (for example, Kopriva *et al.*, 1995,  
286 Fuchs *et al.*, 2019). It is not known whether the GCS operates in a structurally organised mode  
287 in such mitochondria and prokaryotic cells as it does in photorespiring mitochondria or whether  
288 the GCS enzymes diffuse freely, being kinetically linked by their shared mobile H-protein  
289 substrate.

290 In order to test this, we chose the *Synechocystis* GCS, which is considered a *bona fide*  
291 cyanobacterial model for the eukaryotic GCS (Hasse *et al.*, 2013). Since the plant GDC begins  
292 to disaggregate below 0.08 mg ml<sup>-1</sup> total GCS protein (0.25 mg ml<sup>-1</sup> crude matrix protein; Oliver  
293 *et al.*, 1990), corresponding to a combined total molar concentration of about 2.6 μM GCS  
294 proteins, we checked whether the GCS proteins are present in a similar or higher level in  
295 *Synechocystis* cells and what their molar ratios are. To this end, we re-examined a Hi3 dataset  
296 available in our laboratory from earlier experiments (Gärtner *et al.*, 2019), which contained  
297 quantitative data for all GCS proteins and PDC subunits. From these previously collected data,  
298 we calculated an approximate molar ratio of 1L<sub>2</sub>-0.5P<sub>2</sub>-0.6T-2.4H in *Synechocystis* cells (Table  
299 1); however, there is yet no independent support for this ratio from other methods such as  
300 QconCAT or spiked peptide quantification. This is critical only for the *Synechocystis* H-protein,

301 which likely is largely underestimated by Hi3 quantification due to the inherent difficulties in the  
302 quantification of small proteins, represented by very few tryptic peptides. This can be seen  
303 from the fact that a similar ratio of approximately  $1L_2-0.2P_2-0.4T$  (H-protein could not be  
304 quantified) can be calculated from the independent *Synechocystis* proteome data of Zavřel *et*  
305 *al.* (2019).

306 We also calculated from the proteome data of Gärtner *et al.* (2019) that the GCS  
307 proteins would collectively represent approximately 0.07% (w/w) of the total protein in  
308 *Synechocystis* (Table 1) and a larger fraction in the soluble protein fraction. Similar levels can  
309 be derived from proteome data of *Synechocystis* provided by Jahn *et al.* (2018) and Zavřel *et*  
310 *al.* (2019). With a mean protein content of about  $300 \text{ mg ml}^{-1}$  for *Synechocystis* (Jahn *et al.*,  
311 2018), this fraction corresponds to a combined concentration of the GCS proteins of about  $0.2$   
312  $\text{mg ml}^{-1}$ , which is surprisingly close to and even somewhat less than the recently reported GCS  
313 concentration in heterotrophic *Arabidopsis* cells (Fuchs *et al.*, 2019) and 2.5-fold higher than  
314 the above mentioned dissociation threshold of  $0.08 \text{ mg ml}^{-1}$  for the pea leaf GDC (Oliver *et al.*,  
315 1990). It hence appears that a GDC could form in *Synechocystis* (and heterotrophic plant)  
316 cells.

317 In order to test this hypothesis further, we overexpressed and purified His-tagged  
318 versions of the four *Synechocystis* GCS proteins. These proteins were examined for individual  
319 multimerisation and for pairwise and multiple interactions, particularly their potential to form  
320 large complexes. For the *Synechocystis* H-protein, SEC, and retention by a 50 kDa MWCO  
321 filter (Figure 4) confirmed our earlier finding (Hasse *et al.*, 2007) that this protein forms  
322 relatively stable multimers (dimers in high salt and tetramers in low salt). Formation of H-protein  
323 tetramers is not specific for *Synechocystis* but was also observed with the H-protein from  
324 *Peptococcus glycinophilus* (Robinson *et al.*, 1973) and to some extent with plant H-protein  
325 (Oliver *et al.*, 1990).

326 Given its function as a shared substrate, it is unsurprising that the H-protein binds to  
327 each of the three GCS enzyme proteins of *Synechocystis* (Figure 4, T-H<sub>2</sub> or T-H<sub>4</sub>; Figure 5A,  
328 P-H; Figure 6F, P-T-H). The stability of these associations is remarkable; some of them had  
329 been observed with the GCS from other sources. For example, two monomers of chicken liver  
330 H-protein bind fairly stably per one P-protein dimer (Hiraga and Kikuchi, 1980, Kikuchi and  
331 Hiraga, 1982), whereas H- and T-protein monomers from chicken liver (Okamura-Ikeda *et al.*,  
332 1982, Okamura-Ikeda *et al.*, 2010) and pea (Cohen-Addad *et al.*, 1997) form stable T<sub>1</sub>H<sub>1</sub>  
333 complexes, the latter of which has been crystallized (Guilhaudis *et al.*, 2000). Direct interaction  
334 between the plant H-protein and L-protein, except via the freely exposed reduced lipoyl arm  
335 during catalysis, was not observed (Faure *et al.*, 2000, Neuburger *et al.*, 2000). That said, due  
336 to the binding of H-protein monomers to the P<sub>2</sub>- and the T-protein, formation of the full four-

337 protein plant GDC would require direct physical interaction between the P-, the T-, and the L-  
338 protein or, less likely, of these proteins with a hypothetical core 30mer of H-protein as  
339 suggested by Oliver and Raman (1995). Indeed, liver mitochondria P- and L-protein have been  
340 shown to bind tightly to one another without any apparent involvement of H-protein (Hiraga *et*  
341 *al.*, 1972, Motokawa and Kikuchi, 1972). These findings with eukaryotic GCS proteins  
342 correspond well to our observation that the *Synechocystis* P- and L-protein are mutual  
343 interaction partners (Figure 5B, C). However, we presently do not exclude that the P<sub>2</sub>-L<sub>2</sub>  
344 interaction at least partly could include or even be based on multi-way-binding H-protein  
345 tetramers, the presence of which seems to be a characteristic feature of the *Synechocystis*  
346 GCS.

347         Following Neuburger *et al.* (1986), we considered retention on a 300 kDa MWCO filter  
348 as evidence for the formation of a *Synechocystis* GCS multiprotein complex. Indeed, by  
349 contrast to the easily permeating individual proteins, an L-P-T-H complex larger than 300 kDa  
350 formed rapidly when the four proteins were present as a mix at a combined concentration of  
351 1.5 mg ml<sup>-1</sup>. Under this condition, the filter retained about one third of the applied protein after  
352 several washes, demonstrating formation of a multiprotein complex comprising all four GCS  
353 proteins. When the L-protein was omitted, the other three GCS proteins formed a less stable  
354 complex larger than 300 kDa; however, presence of T-protein is essential for complex  
355 formation. The stoichiometry of the *Synechocystis* GDC formed *in vitro*, if it is fixed at all, could  
356 roughly match with the 1L<sub>2</sub>-0.25P<sub>2</sub>-3T-26H ratio from densitometric analysis. The difference  
357 between this 'stoichiometry' and the whole cell GCS protein ratio of 1L<sub>2</sub>-0.5P<sub>2</sub>-0.6T-2.4H,  
358 particularly with respect to the T- and maybe the H-protein, could indicate coexistence of free  
359 and complex-bound GCS proteins *in vivo* as discussed above as a possibility for  
360 heterotrophically cultured Arabidopsis cells. Additionally, in comparison with the plant GDC  
361 molar protein ratios of about 1L<sub>2</sub>-4P<sub>2</sub>-8T-20/26H, it is well possible that the composition of a  
362 (still hypothetical) *Synechocystis* GDC could differ from that of the plant leaf GDC.

363         The recombinant *Synechocystis* T-protein is soluble only in the presence of H-protein  
364 and therefore difficult to handle, a feature by which it resembles the native T-protein from other  
365 sources (Cohen-Addad *et al.*, 1997, Guilhaudis *et al.*, 2000, Okamura-Ikeda *et al.*, 2010). This  
366 has been interpreted as a possible chaperone function of the H-protein in protecting the T-  
367 protein from inactivation (Cohen-Addad *et al.*, 1997). Unfortunately, the recombinant  
368 *Synechocystis* T-protein did not show enzymatic activity. The reason for this is unclear given  
369 that repeated sequencing had confirmed correctness of the respective nucleotide sequence in  
370 the expression vector. The T-protein's N-terminus is essential for proper binding of H-protein  
371 (Lee *et al.*, 2004), which may be blocked by the N-terminal His-tag in the recombinant T-  
372 protein. This is not very likely, however, because our experiments, such as the overexpression  
373 and SEC (Figure 4), confirm binding of the H- to the T-protein to form a soluble T-H<sub>2</sub> or T-H<sub>4</sub>

374 complex. Alternatively, competitive binding of excess oxidised H-protein (the H-protein is  
375 produced in *E. coli* in the dithiolane form (Macherel *et al.*, 1996)) could prevent association  
376 with the aminomethylated form of the H-protein (Guilhaudis *et al.*, 2000), inhibiting the T-  
377 proteins enzymatic activity. Whatever the reason is, solving this methodical hurdle will be  
378 essential for the further examination of the effects that the formation of a GDC has on GCS  
379 activity in the *Synechocystis* system.

## 380 CONCLUSIONS

381 By the application of three quantitative mass spectrometry techniques, we calculated molar  
382 ratios of the leaf mesophyll GDC component proteins of 1L<sub>2</sub>-4P<sub>2</sub>-8T-26H and 1L<sub>2</sub>-4P<sub>2</sub>-8T-20H  
383 for pea and *Arabidopsis*, respectively, with a less than 20% overestimation of L<sub>2</sub> available for  
384 the GDC. Our new data indicate a twofold higher P-protein content of the GDC than the ELISA-  
385 based stoichiometry reported by Oliver *et al.* (1990). The minimum mass of a multiprotein GDC  
386 of this composition would be 1,550-1,650 kDa. In *Arabidopsis* leaves, the GDC contains four  
387 times more of the isoproteins GCS-P1 and GCS-L1 relative to GCS-P2 and GCS-L2,  
388 respectively, whereas the H-proteins GCS-H1 and GCS-H3 are present in about equal  
389 amounts, suggesting they are functionally redundant. GCS-H2 is not a component of the leaf  
390 mesophyll GDC.

391 The four *Synechocystis* GCS proteins associate *in vitro* to form a multiprotein complex  
392 larger than 300 kDa. The GCS content of *Synechocystis* cells is about 0.2 mg protein ml<sup>-1</sup>,  
393 which, by analogy to the reported dissociation threshold of 0.08 mg ml<sup>-1</sup> of the plant GDC,  
394 could trigger complex formation *in vivo*. The determined L-P-T-H ratios in *Synechocystis*  
395 suggest that such complex would be different from the leaf mesophyll GDC and likely coexist  
396 with mobile GCS proteins. We also speculate that the (still hypothetical) *Synechocystis* GDC  
397 could involve H-protein multimers to crosslink the three GCS enzyme proteins, resulting in  
398 multienzyme metabolic complexes that facilitate glycine metabolism.

## 399 MATERIAL AND METHODS

### 400 Mitochondria

401 Mitochondria were isolated from leaves of *Pisum sativum* cv. Kleine Rheinländerin (3-weeks-  
402 old plants) and *Arabidopsis thaliana* Col-0 (8-weeks-old plants) by Percoll density gradient  
403 centrifugation according to Keech *et al.* (2005). Mitochondria were stored at -80 °C for enzyme  
404 measurements in a buffer containing 300 mM sucrose, 10 mM TES, 10 mM K-phosphate, 2  
405 mM Na-EDTA, pH (KOH) 7.5, and for mass spectrometry in a buffer containing 50 mM Tris-  
406 HCl, pH 7.5. Matrix proteins were released by several freeze-thaw cycles followed by 1 h  
407 centrifugation at 40 000 g, 4 °C according to Neuburger *et al.* (1986). Purity was confirmed  
408 and the GCS content quantified by label-free absolute quantification of proteins by the Hi3

409 method as described below.

#### 410 ***Synechocystis***

411 *Synechocystis* sp. PCC 6803 cells were grown in BG11 medium (Rippka *et al.*, 1979) at 29°C,  
412 5% CO<sub>2</sub>, 120 μE m<sup>2</sup> s<sup>-1</sup>. Cells were lysed and proteins were extracted and quantified as  
413 described earlier (Gärtner *et al.*, 2019).

#### 414 **Mass Spectrometry**

415 Mass spectrometry methods are detailed in Supplementary Methods 1. In short, the QconCAT  
416 was generated as described in detail in Pratt *et al.* (2006). Following the selection of suitable  
417 proteotypic peptides (Supplementary Figure S 1), the QconCAT encoding gene was  
418 synthesized by a company (BaseClear, Leiden, NL), inserted into the expression vector  
419 pET28a and expressed in *E. coli*. The isotope-labeled form was obtained by growing cells with  
420 <sup>15</sup>NH<sub>4</sub>Cl as sole nitrogen source and purified by immobilized metal ion affinity chromatography  
421 (IMAC). Synthetic labeled peptides (SpikeTides TQL, labeled with <sup>13</sup>C<sup>15</sup>N Lys) were purchased  
422 from JPT Peptide Technologies (Berlin, Germany). In-solution digestion of proteins was done  
423 by filter-aided sample preparation (FASP, Wiśniewski *et al.*, 2009).

424 LC-MS<sup>E</sup> analyses were carried out using a nanoAcquity UPLC system (Waters,  
425 Manchester, UK) coupled to a Waters Synapt G2-S mass spectrometer. Peptides were  
426 separated on an analytical column (ACQUITY UPLC HSS T3, 1.8 μm, 75 μm x 250 mm,  
427 Waters) at a flow rate of 300 nl min<sup>-1</sup> using a gradient from 3% to 35% acetonitrile in 0.1%  
428 formic acid over 90 min. The Synapt G2-S instrument was operated in data-independent mode  
429 (Geromanos *et al.*, 2009). By executing alternate scans at low and elevated collision energy,  
430 information on precursor and fragment ions, respectively, was acquired (referred to as MS<sup>E</sup>).

431 Progenesis QI for Proteomics version 4.1 (Nonlinear Dynamics, Newcastle upon Tyne,  
432 UK) was used for raw data processing, protein identification and MS1 intensity-based  
433 quantification. Label-free absolute quantification was performed by the Hi3 method (Silva *et al.*  
434 *et al.*, 2006) with Hi3 Phos B standard (Waters) as reference. For the comparison of protein  
435 isoforms, a relative quantification approach using non-conflicting (unique) peptides was  
436 applied. For label-based quantification, the quotients of light and heavy peptide ion  
437 abundances were multiplied by the amount of heavy peptides applied to the LC column. Values  
438 for absolute quantities are calculated as fmol on column.

#### 439 **Recombinant *Synechocystis* GCS proteins**

440 The generation and structure of the *Synechocystis* H-protein (apoprotein 14,580 Da, Slr0879-  
441 pET28a) and P-protein (107,322 Da, Slr0293-pBAD/HisA) overexpression constructs was  
442 described earlier (Hasse *et al.*, 2007).



443 The *Synechocystis* L-protein (*slr1096*, 50,832 Da) was PCR amplified with gene-  
444 specific primers (sense 5'-CTCGAGATGAGTCAGGATTTT-3', antisense 5'-  
445 GAATTCTAAACCGCCCGTTT-3') and *Pfu* polymerase. The amplificate was ligated into  
446 pGEM-T (Promega), from which the gene was excised with *Xho*I/*Eco*RI and ligated into  
447 pBAD/HisA (Invitrogen), yielding *Slr1096*-pBAD/HisA. The *Synechocystis* T-protein gene  
448 (*sll0171*, 41,036 Da) was PCR-amplified using wild-type DNA, gene-specific primers (sense  
449 5'-GGATCCGTGGCCAATCTTTTCCCTG-3' and antisense 5'-  
450 GAATTCTAAACGAGGTTTTTGCTCGG-3') and *Taq* polymerase. After initial cloning of the  
451 PCR amplificate into pGEM-T (Promega), the coding sequence was excised with *Bam*HI/*Eco*RI  
452 and ligated downstream of the His tag into the multiple cloning site MCS1 of pETDuet-1  
453 (ampicillin resistance; Novagen), yielding *Sll0171*-pETDuet-1. All construct were verified by  
454 sequencing.

455 For protein expression, transgenic *E. coli* LMG194 (P- and L-protein in pBAD/HisA) and  
456 *E. coli* BL21 DE3 (all other constructs) were grown in 2YT medium and induced with 1 mM  
457 isopropyl- $\beta$ -D-thiogalactopyranoside (for T- and H-protein) or 0.2% arabinose (for L- and P-  
458 protein) at OD<sup>600</sup> = 0.8-1.0 and further cultivated at 30 °C for 12h, except T-protein (25 °C/12  
459 h). Expression of T-protein alone produced flocculating aggregates during IMAC purification,  
460 whereas coexpression with H-protein from *Slr0879*-pET28a produced stably soluble T-H  
461 complexes. 0.24 mM lipoic acid were added for individual or combined H-protein  
462 overexpression. The relevant features of the used overexpression systems and conditions are  
463 summarised in Supplementary Table S 3.

464 Cells were pelleted by centrifugation (5 min, 9 000 rpm, 4°C) and resuspended in ice-  
465 cold protein-specific buffers: 20 mM Tris-HCl pH 7.8, 50 mM NaCl, 10 mM imidazole for H- and  
466 L-protein, 50 mM Tris-HCl pH 7.5, 200 mM NaCl, 0.1% Tween 80, 1 mM dithiothreitol (DTT)  
467 for T-protein, and 20 mM Na-phosphate pH 7.8, 500 mM NaCl, 0.2 mM PLP, 15 mM  $\beta$ -  
468 mercaptoethanol for P-protein. Lysates were obtained by sonication (six 10 s bursts, 90 W, ice-  
469 cooling) and centrifugation (14 000 rpm, 40 min, 4°C) and used for IMAC purification as above.  
470 Columns were washed three times with 5 ml each of 20 mM Tris-HCl, 50 mM NaCl and 40 mM  
471 imidazole, pH 7.8 (H- and L-protein), 50 mM Tris-HCl pH 7.5, 500 mM NaCl, 0.1% Tween 80,  
472 1 mM DTT (T-protein), or 20 mM Na-phosphate pH 7.8, 500 mM NaCl, 0.2 mM PLP, 15 mM  $\beta$ -  
473 mercaptoethanol, 40 mM imidazole (P-protein). The recombinant proteins were eluted with  
474 three 1 ml washes with the same buffers except higher imidazole concentrations (T-protein  
475 150 mM, H- and L-protein 300 mM, P-protein 500 mM).

#### 476 **Size-exclusion chromatography and immunoblotting**

477 The IMAC-purified recombinant proteins were re-buffered and further purified on a HiLoad  
478 Superdex 200 16/600 column equilibrated in the low ion-strength GCS buffer containing 5 mM



479 3-(N-morpholino)propanesulfonic acid (MOPS), 5 mM Tris-HCl, pH 7.0, 1 mM serine and 20  
480  $\mu$ M PLP or, as indicated, in a high-salt buffer containing 20 mM Tris-HCl (pH 8.0) and 50 mM  
481 NaCl in an ÄktaPrime or ÄktaExplorer system (GE Healthcare). The column was calibrated  
482 with bovine erythrocyte carbonic anhydrase, bovine serum albumin and yeast alcohol  
483 dehydrogenase (Sigma Aldrich). 1 ml samples of the IMAC-purified proteins were separated  
484 at a flow rate of 1 ml min<sup>-1</sup>. Fractions of 1 ml were collected and analysed by polyacrylamide  
485 gel electrophoresis (SDS-PAGE, Laemmli, 1970) in combination with immunoblotting using  
486 mono-specific antibodies generated against *Flaveria trinervia* H-protein, *Synechocystis* T-  
487 protein, Arabidopsis L-protein and *Synechocystis* P-protein. The eluates were concentrated on  
488 Vivaspin 500 10 kDa molecular weight cut-off (MWCO) filter/concentrator columns (Sartorius)  
489 and the proteins stored at -20°C (1 to 5 mg ml<sup>-1</sup>, 10% glycerol).

#### 490 **Molecular mass cut-off filtration**

491 The GCS proteins were individually or in combination diluted in 50  $\mu$ l GCS buffer plus 1 mM  
492 Triton X-100 (GCS/Triton buffer) and incubated for 10 min at room temperature. These samples  
493 were filtered through Vivaspin 500 50 kDa (H-protein multimerisation) or 300 kDa (all other  
494 complex formation experiments) MWCO size-selective filters/concentrators for 3 min at 15 000  
495 g, 4 °C. The filtrates were collected and the retentates rediluted in 50  $\mu$ l of the same buffer and  
496 size-filtered as before. This process was three times repeated and the three consecutive  
497 permeates and the final retentate collected. Protein concentrations were determined (Roti-  
498 Nanoquant Roth, Bradford, 1976) and all samples analyzed by SDS-PAGE on 12%  
499 polyacrylamide gels (Laemmli, 1970). The ImageJ program was used for quantitative  
500 densitometry.

#### 501 **Pull-down studies**

502 50  $\mu$ l ProBond™ nickel-chelating resin (Invitrogen) was saturated in a 500  $\mu$ l batch volume  
503 with 0.5 or 5 mg recombinant *Synechocystis* L-protein or P-protein, respectively, in GCS/Triton  
504 buffer or incubated with GCS/Triton buffer without bait protein as the control. After one wash  
505 cycle with the same buffer to remove unbound protein, the loaded matrices and the unloaded  
506 control matrix were incubated for 60 min with wild-type *Synechocystis* proteins obtained as a  
507 total lysate from cells collected by centrifugation from a 50 ml culture at 2-3 OD<sup>750</sup>, suspended  
508 in GCS/Triton buffer and exposed to two french press cycles. After three washes with 500  $\mu$ l  
509 each of 20 mM Tris-HCl, pH 7.8, 1 M NaCl and 40 mM imidazole, bound proteins were eluted  
510 with 150  $\mu$ l of 20 mM Na-phosphate, pH 7.8, 500 mM NaCl and 300 mM imidazole, examined  
511 by SDS-PAGE in combination with immunoblotting and further analysed by mass spectrometry.  
512 ProBond™ resin saturated with recombinant formate dehydrogenase (*Pseudomonas* sp. 101)  
513 followed by incubation with wild-type *Synechocystis* lysate served as an additional control.

514 **Enzyme assays**

515 P-protein activity was measured by the  $^{14}\text{C}$ -bicarbonate-exchange method according to Hasse  
516 et al. (2007). Briefly, 7.5  $\mu\text{g}$  P-protein (0.08  $\mu\text{M}$ ) and 30  $\mu\text{g}$  H-protein (2  $\mu\text{M}$ ) were added to a  
517 buffer containing 50 mM Na-phosphate (pH 7.0), 1 mM DTT, 0.1 mM PLP and 20 mM glycine.  
518 The reaction was initiated by adding 30 mM Na- $^{14}\text{C}$ -bicarbonate (2.5  $\mu\text{C}$ ) in a final volume of  
519 900  $\mu\text{l}$  at 30 °C. 270  $\mu\text{l}$  samples were removed at 0, 15 and 30 min and mixed with 80  $\mu\text{l}$  50%  
520 trichloroacetic acid to stop the reaction. Control assays did not contain glycine.

521 L-protein activity was determined as the  $\text{NAD}^+$ -dependent oxidation of H-protein  
522 reduced prior the assay with 70 mM tris-(2-carboxyethyl)-phosphine (TCEP) or the  $\text{NADH}$ -  
523 dependent reduction of lipoic acid. Assays contained 10  $\mu\text{g}$  of L-protein in a final volume of 1  
524 ml 100 mM K-phosphate (pH 6.3), 1.5 mM Na-EDTA, 0.6 mg  $\text{ml}^{-1}$  bovine serum albumine, 0.2  
525 mM  $\text{NAD}^+$  or 0.1 mM  $\text{NADH}$  and variable substrate concentrations at 25 °C.

526 **ACKNOWLEDGEMENTS**

527 We would wish to thank Drs. Shanshan Wang and Markus Wirtz (both at the University of  
528 Heidelberg) for their practical support and helpful discussions and appreciate critical  
529 discussions with Dr. Eva-Maria Brouwer (University of Rostock).

530 **REFERENCES**

- 531 **Bar-Even, A.** (2016) Formate assimilation: The metabolic architecture of natural and  
532 synthetic pathways. *Biochemistry*, **55**, 3851-3863.
- 533 **Bauwe, H.** (2018) Photorespiration - damage repair pathway of the Calvin–Benson  
534 cycle. In *Plant Mitochondria, 2<sup>nd</sup> Edition* (Logan, D.C. ed). Chichester, UK: John  
535 Wiley & Sons, Ltd, pp. 293-342.
- 536 **Bauwe, H., et al.** (2010) Photorespiration: players, partners and origin. *Trends Plant*  
537 *Sci.*, **15**, 330-336.
- 538 **Bauwe, H. and Kolukisaoglu, Ü.** (2003) Genetic manipulation of glycine  
539 decarboxylation. *J. Exp. Bot.*, **54**, 1523-1535.
- 540 **Bourguignon, J., et al.** (1996) Glycine decarboxylase and pyruvate-dehydrogenase  
541 complexes share the same dihydrolipoamide dehydrogenase in pea leaf  
542 mitochondria - evidence from mass-spectrometry and primary-structure  
543 analysis. *Biochem. J.*, **313**, 229-234.
- 544 **Bourguignon, J., et al.** (1988) Resolution and characterization of the glycine cleavage  
545 reaction in pea leaf mitochondria. Properties of the forward reaction catalysed  
546 by glycine decarboxylase and serine hydroxymethyltransferase. *Biochem. J.*,  
547 **255**, 169-178.
- 548 **Bradford, M.M.** (1976) A rapid and sensitive method for the quantitation of microgram  
549 quantities of protein utilizing the principle of protein-dye binding. *Anal. Biochem.*,  
550 **72**, 248-254.
- 551 **Cohen-Addad, C., et al.** (1997) Structural studies of the glycine decarboxylase  
552 complex from pea leaf mitochondria. *Biochimie*, **79**, 637-643.
- 553 **Douce, R., et al.** (2001) The glycine decarboxylase system: a fascinating complex.  
554 *Trends Plant Sci.*, **6**, 167-176.
- 555 **Engel, N., et al.** (2011) The presequence of Arabidopsis serine  
556 hydroxymethyltransferase SHM2 selectively prevents import into mesophyll  
557 mitochondria. *Plant Physiol.*, **157**, 1711-1720.
- 558 **Engel, N., et al.** (2007) Deletion of glycine decarboxylase in Arabidopsis is lethal under  
559 non-photorespiratory conditions. *Plant Physiol.*, **144**, 1328-1335.
- 560 **Fan, J., et al.** (2014) Quantitative flux analysis reveals folate-dependent NADPH  
561 production. *Nature*, **510**, 298-302.
- 562 **Faure, M., et al.** (2000) Interaction between the lipoamide-containing H-protein and  
563 the lipoamide dehydrogenase (L-protein) of the glycine decarboxylase

- 564 multienzyme system. 2. Crystal structures of H- and L-proteins. *Eur. J.*  
565 *Biochem.*, **267**, 2890-2898.
- 566 **Freudenberg, W. and Andreesen, J.R.** (1989) Purification and partial  
567 characterization of the glycine decarboxylase multienzyme complex from  
568 *Eubacterium acidaminophilum*. *J. Bacteriol.*, **171**, 2209-2215.
- 569 **Fuchs, P., et al.** (2019) Single organelle function and organization as estimated from  
570 *Arabidopsis* mitochondrial proteomics. *Plant J.*, DOI 10.1111/tpj.14534.
- 571 **Gärtner, K., et al.** (2019) Cytosine N4-methylation via M.Ssp6803II is involved in the  
572 regulation of transcription, fine-tuning of DNA replication and DNA repair in the  
573 cyanobacterium *Synechocystis* sp. PCC 6803. *Front. Microbiol.*, **10**, 1233.
- 574 **Geromanos, S.J., et al.** (2009) The detection, correlation, and comparison of peptide  
575 precursor and product ions from data independent LC-MS with data dependant  
576 LC-MS/MS. *Proteomics*, **9**, 1683-1695.
- 577 **Guilhaudis, L., et al.** (2000) Combined structural and biochemical analysis of the H-T  
578 complex in the glycine decarboxylase cycle: evidence for a destabilization  
579 mechanism of the H-protein. *Biochemistry*, **39**, 4259-4266.
- 580 **Hasse, D., et al.** (2013) Structure of the homodimeric glycine decarboxylase P-protein  
581 from *Synechocystis* sp. PCC 6803 suggests a mechanism for redox regulation.  
582 *J. Biol. Chem.*, **288**, 35333-35345.
- 583 **Hasse, D., et al.** (2007) Properties of recombinant glycine decarboxylase P- and H-  
584 protein subunits from the cyanobacterium *Synechocystis* sp. strain PCC 6803.  
585 *FEBS Lett.*, **581**, 1297-1301.
- 586 **Hiraga, K. and Kikuchi, G.** (1980) The mitochondrial glycine cleavage system.  
587 Functional association of glycine decarboxylase and aminomethyl carrier  
588 protein. *J. Biol. Chem.*, **255**, 11671-11676.
- 589 **Hiraga, K., et al.** (1972) Enzyme complex nature of the reversible glycine cleavage  
590 system of cock liver mitochondria. *J. Biochem.*, **72**, 1285-1289.
- 591 **Jahn, M., et al.** (2018) Growth of cyanobacteria is constrained by the abundance of  
592 light and carbon assimilation proteins. *Cell Rep.*, **25**, 478-486.e478.
- 593 **Kawasaki, H., et al.** (1966) A new reaction for glycine biosynthesis. *Biochem. Biophys.*  
594 *Res. Commun.*, **23**, 227-233.
- 595 **Keech, O., et al.** (2005) Preparation of leaf mitochondria from *Arabidopsis thaliana*.  
596 *Physiol. Plant.*, **124**, 403-409.

- 597 **Kikuchi, G. and Hiraga, K.** (1982) The mitochondrial glycine cleavage system. Unique  
598 features of the glycine decarboxylation. *Mol. Cell. Biochem.*, **45**, 137-149.
- 599 **Kikuchi, G., et al.** (2008) Glycine cleavage system: reaction mechanism, physiological  
600 significance, and hyperglycinemia. *Proc. Japan Acad., Ser. B Phys. Biol. Sci.*,  
601 **84**, 246-263.
- 602 **Kisaki, T., et al.** (1971) Glycine decarboxylase and serine formation in spinach leaf  
603 mitochondrial preparation with reference to photorespiration. *Plant Cell Physiol.*,  
604 **12**, 275-288.
- 605 **Kopriva, S., et al.** (1995) Alternative splicing results in two different transcripts for H-  
606 protein of the glycine cleavage system in the C<sub>4</sub> species *Flaveria trinervia*. *Plant*  
607 *J.*, **8**, 435-441.
- 608 **Laemmli, U.K.** (1970) Cleavage of structural proteins during the assembly of the head  
609 of bacteriophage T4. *Nature*, **227**, 680-685.
- 610 **Lee, H.H., et al.** (2004) Crystal structure of T-protein of the glycine cleavage system:  
611 Cofactor binding, insights into H-protein recognition, and molecular basis for  
612 understanding nonketotic hyperglycinemia. *J. Biol. Chem.*, **279**, 50514-50523.
- 613 **Luethy, M.H., et al.** (2001) Developmental expression of the mitochondrial pyruvate  
614 dehydrogenase complex in pea (*Pisum sativum*) seedlings. *Physiol. Plant.*, **112**,  
615 559-566.
- 616 **Lutziger, I. and Oliver, D.J.** (2001) Characterization of two cDNAs encoding  
617 mitochondrial lipoamide dehydrogenase from *Arabidopsis*. *Plant Physiol.*, **127**,  
618 615-623.
- 619 **Macherel, D., et al.** (1996) Expression, lipoylation and structure determination of  
620 recombinant pea H-protein in *Escherichia coli*. *Eur. J. Biochem.*, **236**, 27-33.
- 621 **Mooney, B.P., et al.** (2002) The complex fate of  $\alpha$ -ketoacids. *Annu. Rev. Plant Biol.*,  
622 **53**, 357-375.
- 623 **Motokawa, Y. and Kikuchi, G.** (1971) Glycine metabolism in rat liver mitochondria. V.  
624 Intramitochondrial localization of the reversible glycine cleavage system and  
625 serine hydroxymethyltransferase. *Arch. Biochem. Biophys.*, **146**, 461-464.
- 626 **Motokawa, Y. and Kikuchi, G.** (1972) Isolation and partial characterization of the  
627 components of the reversible glycine cleavage system of rat liver mitochondria.  
628 *J. Biochem.*, **72**, 1281-1284.
- 629 **Mouillon, J.M., et al.** (1999) Glycine and serine catabolism in non-photosynthetic  
630 higher plant cells: their role in C1 metabolism. *Plant J.*, **20**, 197-205.

- 631 **Neuburger, M., et al.** (1986) Isolation of a large complex from the matrix of pea leaf  
632 mitochondria involved in the rapid transformation of glycine into serine. *FEBS*  
633 *Lett.*, **207**, 18-22.
- 634 **Neuburger, M., et al.** (2000) Interaction between the lipoamide-containing H-protein  
635 and the lipoamide dehydrogenase (L-protein) of the glycine decarboxylase  
636 multienzyme system. 1. Biochemical studies. *Eur. J. Biochem.*, **267**, 2882-2889.
- 637 **Okamura-Ikeda, K., et al.** (1982) Purification and characterization of chicken liver T-  
638 protein, a component of the glycine cleavage system. *J. Biol. Chem.*, **257**, 135-  
639 139.
- 640 **Okamura-Ikeda, K., et al.** (2010) Crystal structure of aminomethyltransferase in  
641 complex with dihydrolipoyl-H-protein of the glycine cleavage system:  
642 Implications for recognition of lipoyl protein substrate, disease-related  
643 mutations, and reaction mechanism. *J. Biol. Chem.*, **285**, 18684-18692.
- 644 **Oliver, D.J., et al.** (1990) Interaction between the component enzymes of the glycine  
645 decarboxylase multienzyme complex. *Plant Physiol.*, **94**, 833-839.
- 646 **Oliver, D.J. and Raman, R.** (1995) Glycine decarboxylase: protein chemistry and  
647 molecular biology of the major protein in leaf mitochondria. *J. Bioenerg.*  
648 *Biomembr.*, **27**, 407-414.
- 649 **Patel, M.S., et al.** (2014) The pyruvate dehydrogenase complexes: structure-based  
650 function and regulation. *J. Biol. Chem.*, **289**, 16615-16623.
- 651 **Pratt, J.M., et al.** (2006) Multiplexed absolute quantification for proteomics using  
652 concatenated signature peptides encoded by QconCAT genes. *Nat. Protoc.*, **1**,  
653 1029.
- 654 **Rippka, R., et al.** (1979) Generic assignments, strain histories and properties of pure  
655 cultures of cyanobacteria. *Microbiology*, **111**, 1-61.
- 656 **Robinson, J.R., et al.** (1973) Glycine metabolism. Lipoic acid as the prosthetic group  
657 in the electron transfer protein P2 from *Peptococcus glycinophilus*. *J. Biol.*  
658 *Chem.*, **248**, 5319-5323.
- 659 **Schmitt, D.L. and An, S.** (2017) Spatial organization of metabolic enzyme complexes  
660 in cells. *Biochemistry*, **56**, 3184-3196.
- 661 **Schnatbaum, K., et al.** (2011) SpikeTides™ - proteotypic peptides for large-scale MS-  
662 based proteomics. *Nat. Methods*, **8**, 272.
- 663 **Silva, J.C., et al.** (2006) Absolute quantification of proteins by LCMS<sup>E</sup>: A virtue of  
664 parallel MS acquisition. *Mol. Cell. Proteomics*, **5**, 144-156.



- 665 **Smith, D.G.S., et al.** (2016) Design and expression of a QconCAT protein to validate  
666 Hi3 protein quantification of influenza vaccine antigens. *J. Proteom.*, **146**, 133-  
667 140.
- 668 **Vauclare, P., et al.** (1996) Regulation of the expression of the glycine decarboxylase  
669 complex during pea leaf development. *Plant Physiol.*, **112**, 1523-1530.
- 670 **Walker, J.L. and Oliver, D.J.** (1986) Glycine decarboxylase multienzyme complex.  
671 Purification and partial characterization from pea leaf mitochondria. *J. Biol.*  
672 *Chem.*, **261**, 2214-2221.
- 673 **Wiśniewski, J.R., et al.** (2009) Universal sample preparation method for proteome  
674 analysis. *Nat. Methods*, **6**, 359-362.
- 675 **Yishai, O., et al.** (2018) In vivo assimilation of one-carbon via a synthetic reductive  
676 glycine pathway in *Escherichia coli*. *ACS Synth. Biol.*, **7**, 2023-2028.
- 677 **Zavřel, T., et al.** (2019) Quantitative insights into the cyanobacterial cell economy.  
678 *eLife*, **8**, e42508.
- 679

680 **TABLES**

681 **Table 1. Quantification of GCS proteins in *Synechocystis* by quantitative proteomics.**

682 Values show relative amounts and GCS component ratios as determined by using the Hi3  
683 technique. Means were calculated from our previous dataset (Gärtner *et al.*, 2019), which contains  
684 reliable data for all GCS and PDC subunits. The fraction of L-protein that is available for the GCS  
685 was calculated on the assumption that the molar amount of L-protein bound to prokaryotic PDC  
686 equals the average of the two PDC E1 subunits (Patel *et al.*, 2014).

687

|                                     | Mole %       | Molar ratio<br>to GCS L-protein | Mass %       |
|-------------------------------------|--------------|---------------------------------|--------------|
| PDC E1alpha                         | 0.058        | 3.4                             | 0.068        |
| PDC E1beta                          | 0.063        | 3.7                             | 0.069        |
| PDC E2                              | 0.118        | 6.9                             | 0.163        |
| Total L-protein (PDC + GCS)         | 0.077        | 4.5                             | 0.121        |
| PDC L-protein (E3 ~ mean of E1)     | 0.060        | 3.5                             | 0.094        |
| <b>GCS L-protein</b>                | <b>0.017</b> | <b>1.0</b>                      | <b>0.026</b> |
| <b>GCS P-protein</b>                | <b>0.009</b> | <b>0.5</b>                      | <b>0.028</b> |
| <b>GCS T-protein</b>                | <b>0.005</b> | <b>0.3</b>                      | <b>0.007</b> |
| <b>GCS H-protein</b>                | <b>0.020</b> | <b>1.2</b>                      | <b>0.009</b> |
| <b>Sum GCS L-, H, T-, P-protein</b> | <b>0.051</b> | <b>3.0</b>                      | <b>0.070</b> |
| SHMT                                | 0.110        | 6.5                             | 0.157        |

688

689 **FIGURES**

690 **Figure 1. The GCS reaction cycle.**

691 Three closely cooperating enzymes, P-, T- and L-protein, oxidise glycine to form 5,10-methylene-  
692 THF, CO<sub>2</sub> and NH<sub>3</sub>, reducing NAD<sup>+</sup> to NADH. They produce and use three variants of the  
693 lipoyllysine arm of their shared substrate, H-protein (Kikuchi *et al.*, 2008). The dithiolane form  
694 serves as an oxidant and conveys the glycine's methylene group to THF.

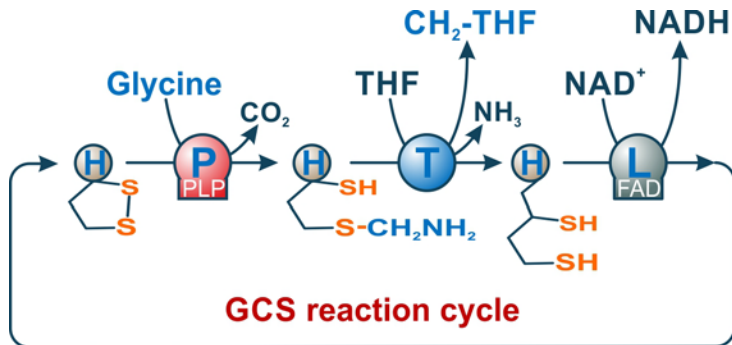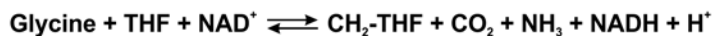

698 **Figure 2. Stoichiometry of the GDC in pea and Arabidopsis leaf mitochondria.**

699 Molar ratios of the T-, P-, and H-proteins referred to L-protein (set to 1) are shown. Results from  
700 label-based quantification approaches using QconCAT and synthetic labeled peptides (SpikeTides)  
701 are compared to the label-free Hi3 method. No result is given for P-protein quantification with  
702 SpikeTides (n.d.), because of significant oxidation of the respective peptide preventing its correct  
703 quantification.

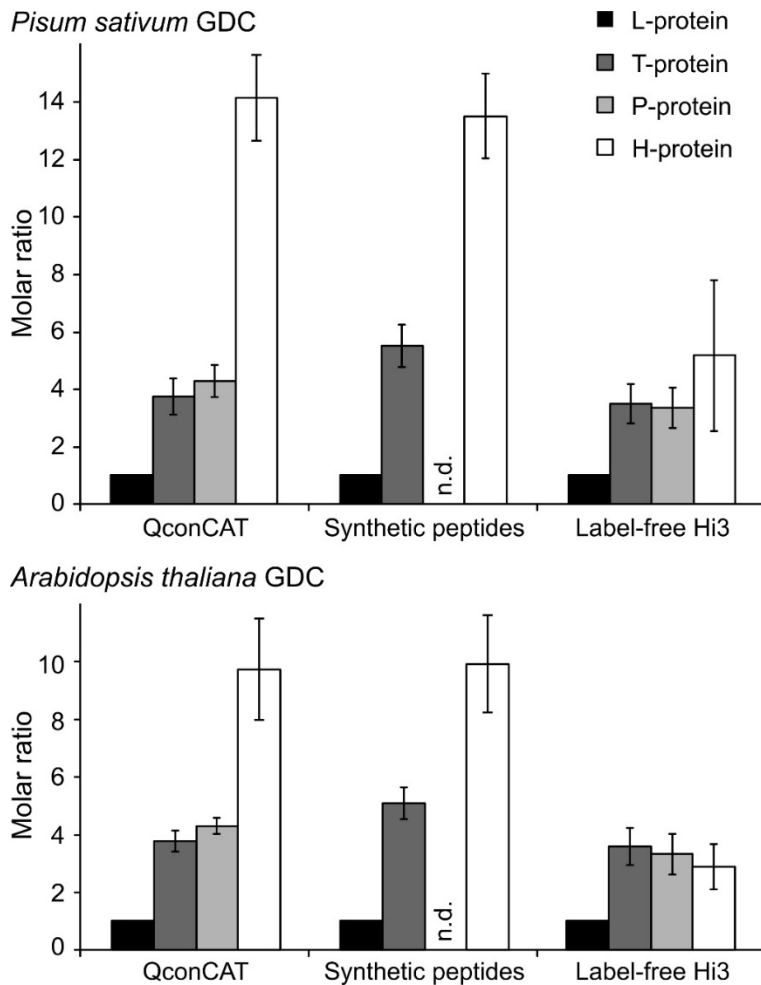

704

705

706 **Figure 3. Isoforms contributing to the GDC and to SHMT in *Arabidopsis leaf mitochondria*.**

707 Molar percentages of the GDC isoforms were calculated by a label-free approach using all pairs  
708 of highly similar peptides that differ in one or few amino acid residues and by the isoform-specific  
709 QconCAT peptides. SHMT isoforms were analyzed by the label-free approach only.

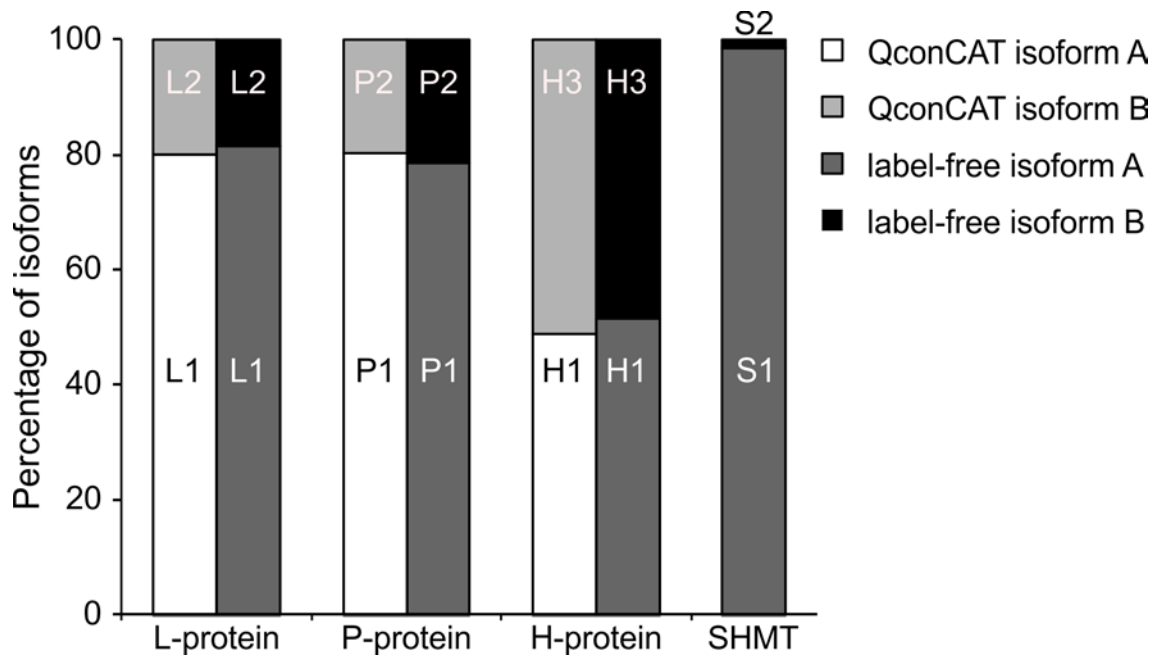

710

711

712 **Figure 4. SEC purification of recombinant *Synechocystis* GCS proteins.**

713 In the low-ion-strength GCS buffer (open circles), which facilitates protein-protein interaction, the  
714 P-, L- and H-protein eluted in SEC as dimers ( $P_2$ ,  $L_2$ ) and likely tetramers ( $H_4$ ). The *Synechocystis*  
715 T-protein requires H-protein to remain in solution and elutes in the GCS buffer as an ~100 kDa  
716 complex, likely  $TH_4$ . The H-protein multimers and the  $TH_4$  complex disaggregate in a buffer  
717 containing 50 mM NaCl (closed circles). Similarly, the H-protein dissociates from the  $TH_4$  complex  
718 during SEC in the high-salt buffer and T-protein multimers become visible following non-denaturing  
719 PAGE (faint bands labeled with \* at 45 kDa and higher). The bottom panel confirms that T- and H-  
720 protein associate in a complex larger 50 kDa, preventing passage through the 50 kDa MWCO filter  
721 membrane.

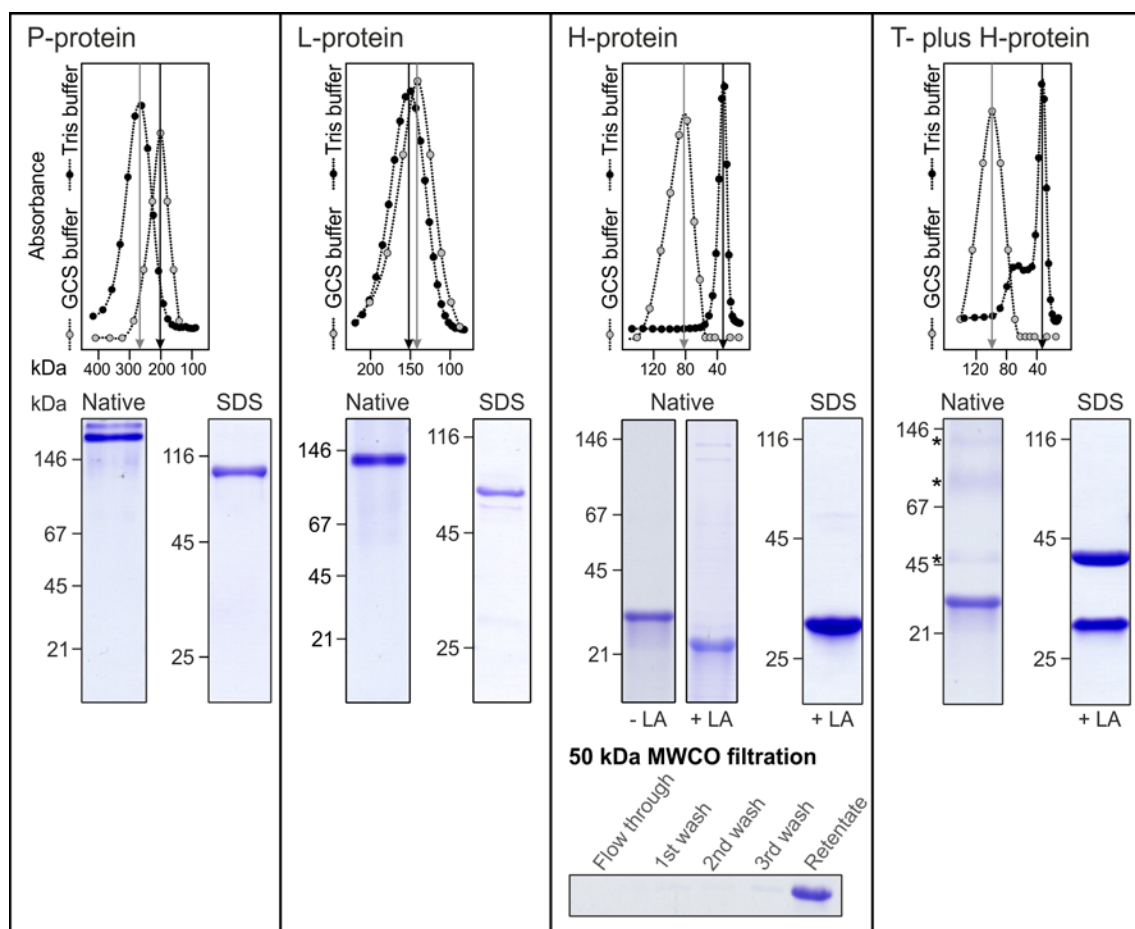

722



723 **Figure 5. Pull-down of proteins interacting with *Synechocystis* P- and L-protein.**

724 **(A)** *E. coli* P-protein copurifies with the recombinant *Synechocystis* H-protein.

725 **(B)** Immobilized *Synechocystis* P-protein recovers the L-protein from *Synechocystis* lysate proteins  
726 as shown by SDS-PAGE and immunoblot with a monospecific antibody.

727 **(C)** Immobilized *Synechocystis* L-protein recovers the P-protein from *Synechocystis* lysate proteins  
728 as shown by SDS-PAGE and immunoblot with a monospecific antibody.

729 **(D)** L-protein is not recovered from the *Synechocystis* lysate proteins in the absence of immobilized  
730 P-protein (left) or by *Pseudomonas* formate dehydrogenase as an unrelated bait (right).

731

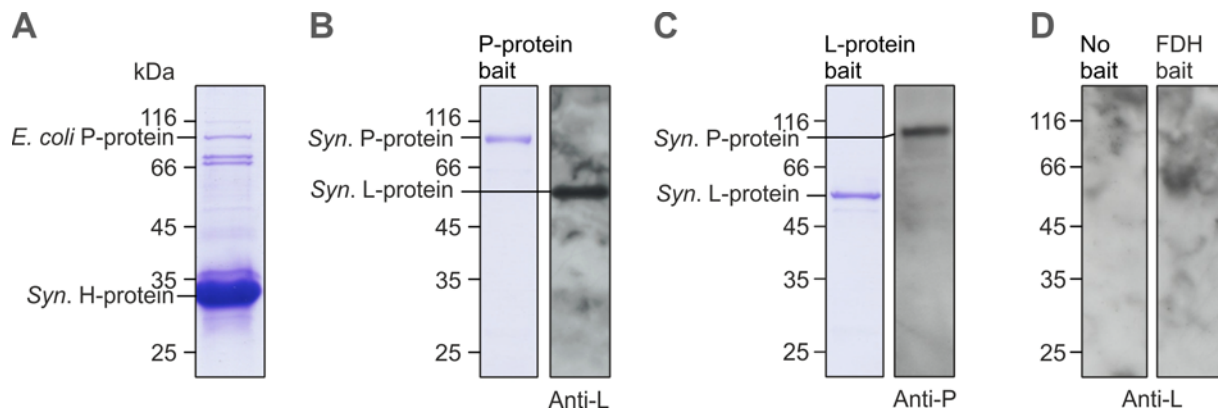

732

733 **Figure 6. *Synechocystis* GCS proteins form a complex larger than 300 kDa *in vitro*.**

734 **(A)** All GCS proteins permeate a 300 kDa MWCO filter membrane if individually applied. Next to  
735 the first filtration, the retentate was three times rediluted with 50  $\mu$ l GCS/Triton buffer and re-filtrated.  
736 None of the GCS proteins can be detected in the final retentate after three successive washes as  
737 examined by SDS-PAGE. Initial concentrations were 5.5  $\mu$ g P-protein, 45  $\mu$ g H-protein, 14  $\mu$ g T-  
738 protein or 11  $\mu$ g L-protein in 50  $\mu$ l GCS/Triton buffer.

739 **(B)** If applied as a mixture preincubated for 10 min under otherwise identical conditions, substantial  
740 fractions of all four GCS proteins are retained on the 300 kDa MWCO filter membrane. The initial  
741 combined protein concentration was 1.5 mg ml<sup>-1</sup>.

742 **(C)** The artificial P-H-T-L complex forms rapidly even without preincubation. Other conditions as in  
743 B.

744 **(D)** P-H-T-L complex formation is more complete after 60 min preincubation. Other conditions as in  
745 B.

746 **(E)** P-H-T-L complex formation requires T-protein. Other conditions as in B.

747 **(F)** A P-T-H complex larger than 300 kDa forms without L-protein but is less stable than the P-H-T-  
748 L complex. Other conditions as in B.

749 **(G)** Approximate molar ratios (4L<sub>2</sub>-1P<sub>2</sub>-12T-105H) for the artificial *Synechocystis* GDC as calculated  
750 from SDS-PAGE (non-calibrated densitometry, P-protein arbitrarily set to 2 (one P<sub>2</sub> dimer), seven  
751 independent repeats of the experiment shown in panel B).

752

### A (controls)

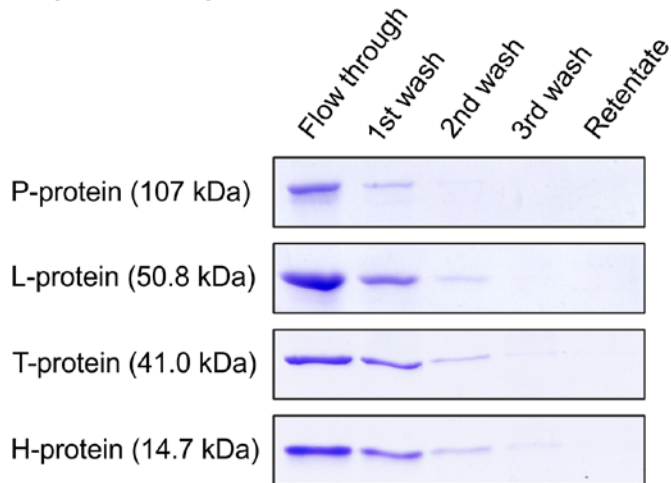

### B (no pre-incubation)

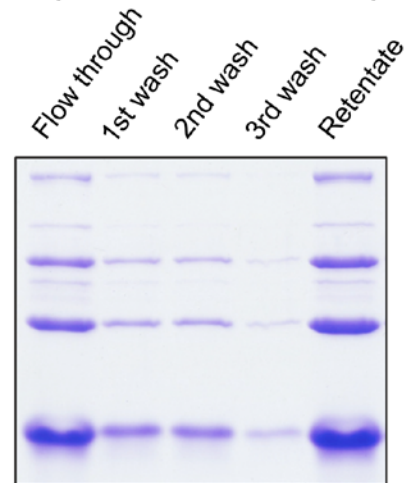

### C (10 min pre-incubation)

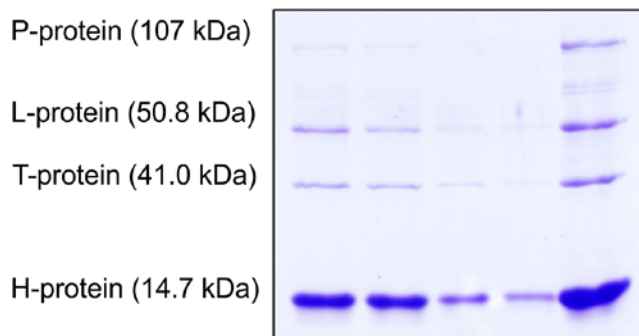

### D (60 min pre-incubation)

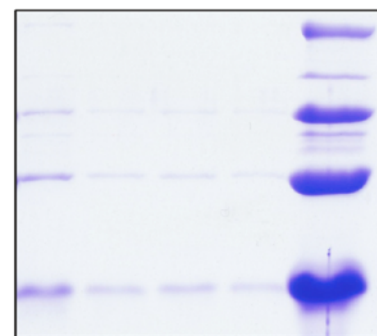

### E (P-L-H, no T-protein)

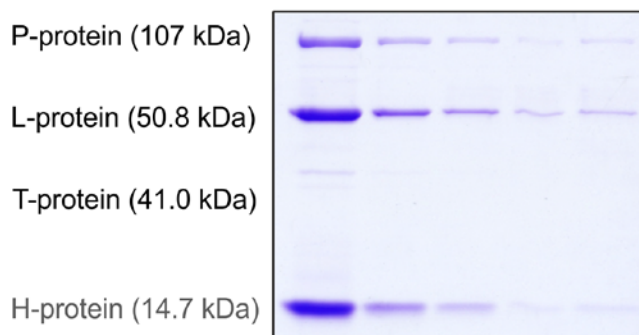

### F (P-T-H, no L-protein)

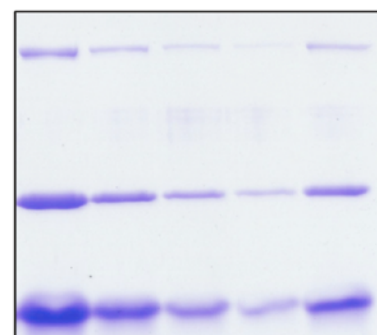

### G (approximate molar ratios by densitometry)

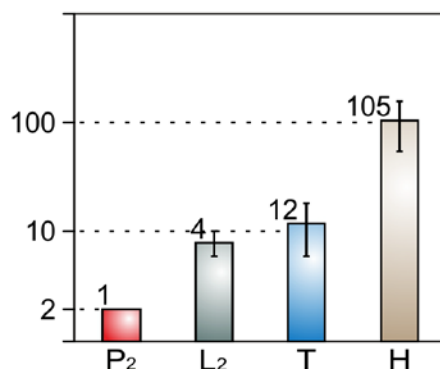

---

## 754 SUPPLEMENTARY DATA

### 755 Supplementary Methods 1. Mass spectrometry.

#### 756 *Peptides for stable isotope-based quantification of plant GCS proteins and design of a QConCAT*

757 A synthetic protein was designed that comprises a concatenation of proteotypic peptides  
758 (QconCAT, Pratt *et al.*, 2006) to facilitate the stoichiometric analysis of the GCS in Arabidopsis and  
759 pea leaf mitochondria. Peptides were selected that allowed identification of GCS proteins in  
760 previous LC-MS<sup>E</sup> measurements. To achieve high comparability between Arabidopsis and pea,  
761 pairs of homologous peptides with minimal length of nine amino acids were selected from the  
762 aligned protein sequences (for example, Supplementary Figure S 3). Peptides containing  
763 methionine or cysteine were usually excluded. Methionine-containing peptides were only selected  
764 if they showed minimal oxidation in the mitochondrial extracts of Arabidopsis and pea. Two peptides  
765 per protein were incorporated into the QConCAT (Supplementary Figure S 1). For the isoforms of  
766 the Arabidopsis L-, P-, and H-proteins, one peptide each was isoform-specific while the second  
767 peptide was specific for both isoforms. The flanking sequences of the peptides were derived from  
768 the native proteins. Peptides of rabbit phosphorylase B flanked by the linker sequence ASGK  
769 (Smith *et al.*, 2016) were incorporated at both ends of the QConCAT to enable quantification of the  
770 QconCAT amount via a synthetic Hi3 Phos B standard (Waters, Manchester, UK). The QconCAT-  
771 encoding gene was synthesized (BaseClear, Leiden, NL), inserted into the expression vector  
772 pET28a and expressed in *E. coli*. The stable isotope-labeled protein was obtained by growing cells  
773 with <sup>15</sup>NH<sub>4</sub>Cl as sole nitrogen source and purified by immobilized metal ion affinity chromatography  
774 (IMAC).

775 The stoichiometric analysis of the GCS was alternatively performed by using synthetic  
776 labeled peptides (SpikeTides TQL, labeled with <sup>13</sup>C<sup>15</sup>N Lys; JPT Peptide Technologies, Berlin,  
777 Germany) as shown in the Supplementary Table S 2. The SpikeTide peptide IAILNANYMAK, which  
778 is specific for the P-protein from pea and both isoforms of the P-protein of Arabidopsis, was highly  
779 oxidized and could not be used. This finding was in contrast to the much lower ratio of oxidation  
780 products of this peptide in tryptic digests of the QConCAT and native mitochondrial P-protein.

#### 781 *In-solution digestion of proteins and tagged SpikeTide peptides*

782 20 µg of mitochondrial matrix proteins in 20 µl solubilization buffer containing 1% sodium dodecyl  
783 sulfate (SDS), 50 mM DTT and 50 mM Tris-HCl, pH 7.6 were incubated at 95°C for 5 min, cleared  
784 by centrifugation at 12000 x g for 5 min and further processed by filter-aided sample preparation  
785 (FASP, Wiśniewski *et al.*, 2009) by using Microcon YM-30-filter devices (Millipore). The processing  
786 steps for detergent removal, alkylation, buffer exchange and protein digestion comprised two initial  
787 washes with a solution of 8 M urea in 0.1 M Tris-HCl pH 8.5 (buffer UA) followed by incubation with  
788 50 mM iodoacetamide (IAA) in UA for 20 min, two washes with UA to deplete IAA and finally three

789 washes with 50 mM ammonium bicarbonate (buffer ABC). Then, digestion with trypsin was  
790 performed at an enzyme-to-protein ratio of 1:50 in 40  $\mu$ l of 50 mM ABC at 37° C for 16 h. Peptides  
791 were collected by centrifugation and fresh trypsin solution was added onto the filter for a second  
792 digestion for 2 h. After centrifugation, the combined digests were acidified with trifluoroacetic acid  
793 (TFA, final concentration 0.25% w/v), concentrated by use of a centrifugal evaporator and diluted  
794 to a final volume of 30  $\mu$ l with a solution containing 2% acetonitrile and 0.1% (w/v) formic acid in  
795 water. Peptide concentrations were measured using the Qubit protein assay (Thermo Fisher  
796 Scientific, Waltham, MA, USA).

797 QConCAT protein was added to mitochondrial matrix proteins before FASP and was  
798 digested in parallel to the mitochondrial proteins. Tagged SpikeTide peptides (JPT Peptide  
799 Technologies, Berlin, Germany) were solubilized in a solution consisting of 80% of 0.1 M ABC and  
800 20% acetonitrile as recommended by the producer. The peptides were either mixed in an equimolar  
801 ratio or in a weighted ratio of 1:3:10 for the L-, T- and H-protein-specific peptides. To separate the  
802 tryptic peptides from the Qtag an equal volume of 50 mM ABC containing trypsin (enzyme to  
803 peptide ratio of 1:50) was added. Peptides were digested at 37° C for 14 h, acidified with TFA,  
804 concentrated in a centrifugal evaporator and diluted with a solution containing 2% acetonitrile and  
805 0.1% formic acid in water. Digested mixtures of the SpikeTide peptides were added to peptide  
806 preparations of mitochondrial matrix proteins prior to LC-MS.

#### 807 *Analysis by nanoLC-MS<sup>E</sup>*

808 LC-MS<sup>E</sup> analyses were carried out using a nanoAcquity UPLC system (Waters, Manchester, UK)  
809 coupled to a Waters Synapt G2-S mass spectrometer via a NanoLockSpray ion source. Mobile  
810 phase A contained 0.1% formic acid in water, and mobile phase B contained 0.1% formic acid in  
811 acetonitrile. Samples containing 10 ng of peptides from digested mitochondrial matrix proteins and  
812 experiment-dependent additions of QConCAT or SpikeTide peptides supplemented with 10 fmol of  
813 Hi3 Phos B standard for protein absolute quantification (Waters) were trapped and desalted using  
814 a pre-column (nanoAcquity UPLC Symmetry C18, 5  $\mu$ m, 180  $\mu$ m x 20 mm, Waters) at a flow rate  
815 of 10  $\mu$ l min<sup>-1</sup> for 4 min with mobile phase A. Peptides were separated on an analytical column  
816 (ACQUITY UPLC HSS T3, 1.8  $\mu$ m, 75  $\mu$ m x 250 mm, Waters) at a flow rate of 300 nl min<sup>-1</sup> using a  
817 gradient from 3% to 35% B over 90 min. The column temperature was maintained at 35 °C. The  
818 SYNAPT G2-S instrument was operated in data-independent mode (Geromanos *et al.*, 2009). By  
819 executing alternate scans at low and elevated collision energy, information on precursor and  
820 fragment ions, respectively, was acquired (referred to as MS<sup>E</sup>).

#### 821 *nanoLC-MS<sup>E</sup> data processing, protein identification and quantification*

822 Progenesis QI for Proteomics version 4.1 (Nonlinear Dynamics, Newcastle upon Tyne, UK) was  
823 used for raw data processing, protein identification and quantification. Alignment was performed to

824 compensate for between-run variation in the LC separation. Peptide and protein identifications  
825 were obtained by searching against databases containing 15,789 reviewed protein sequences from  
826 *Arabidopsis thaliana* and 1903 reviewed and non-reviewed protein sequences from *Pisum sativum*  
827 (UniProt release 2018\_06). The sequences of rabbit phosphorylase B (P00489) and porcine trypsin  
828 were appended into these databases. Two missing cleavage sites were allowed, oxidation of  
829 methionine residues was considered as variable modification, and carbamidomethylation of  
830 cysteines as fixed modification. Additionally, variable modifications of all amino acids by <sup>15</sup>N- or  
831 <sup>13</sup>C<sup>15</sup>N-lysine were applied for analysis of samples containing QConCAT or SpikeTide peptides.  
832 The false discovery rate was set to 4%. Peptides were required to be identified by at least three  
833 fragment ions and proteins by at least six fragment ions and two peptides. Subsequently, peptide  
834 ion data were filtered to retain only peptide ions that met the following criteria: (i) identified at least  
835 two times within the dataset, (ii) ion score greater 6.0, (iii) mass error below 10.0 ppm, (iiii) at least  
836 6 amino acid residues in length. For label-free quantification of all proteins, the Hi3 method  
837 implemented into the Progenesis Q1 for Proteomics workflow was applied using the Hi3 Phos B  
838 standard (Waters) as a reference (Silva *et al.*, 2006). Hi3 peptide quantification uses the sum of  
839 the signal intensities of the three most abundant peptides of each protein, divided by the sum of  
840 the signal intensities of the three most abundant peptides of the internal standard, multiplied by the  
841 amount of standard applied to the column.

842 The label-free calculation of the ratios between the isoforms of the L-, P- and H-protein of  
843 *Arabidopsis* was not carried out by the Hi3 method, but incorporated all pairs of isoform-specific  
844 peptide ions whose sequences differed only in one or a few amino acid positions ("homologous  
845 peptides"). Such peptides should generate comparable signal intensities. From the summed up  
846 abundances of the peptide ion signals of the isoforms to be compared, their molar ratio was  
847 determined.

848 The QConCAT added to the mitochondrial extracts was quantified using the unlabeled  
849 phosphorylase B peptide standard (Hi3 PhosB, Waters) with which the samples were  
850 supplemented before LC-MS measurements. The QConCAT concentration was calculated as the  
851 quotient of the heavy-labeled peptide abundance (QConCAT digestion) by the light peptide  
852 abundance (Hi3 PhosB standard) times the amount of Hi3 PhosB standard. From the results for  
853 the two phosphorylase B peptides integrated into the QConCAT, the mean value was calculated.

854 To quantify the GDC proteins by means of isotope-labeled peptides, the quotients of light  
855 and heavy-labeled peptide ion abundances were determined. If different charge states were  
856 detected for a peptide, their abundances were summed up. It was ensured that for both light and  
857 heavy-labeled peptides the same charge states were used for the calculation. The quotients of light  
858 and heavy peptide ion abundances were then multiplied by the amount of heavy peptides applied  
859 to the LC column. Thus, values for absolute quantities are calculated as fmol on column.

860



861 **Table S 1. Arabidopsis mitochondrial matrix protein identification and Hi3 quantification of**  
862 **two independent mitochondrial preparations, of which each four proteolytic digestions were**  
863 **analyzed by mass spectrometry.**

864 Supplementary Table S1.xlsx

865

---

866 **Table S 2. Synthetic peptides terminally labeled with  $^{13}\text{C}^{15}\text{N}$  Lys (SpikeTides TQL).**

| Peptide sequence | Peptide specificity                                |
|------------------|----------------------------------------------------|
| YAPSHEWVK        | H-protein (pea)                                    |
| YANSHEWVK        | H-protein isoform 1 and 3 (Arabidopsis)            |
| AIDNAEGLVK       | L-protein (pea), L-protein isoform 1 (Arabidopsis) |
| AIDTAEGMVK       | L-protein isoform 2 (Arabidopsis)                  |
| GGAIIDSVITK      | T-protein (pea), T-protein (Arabidopsis)           |

867

868

869 **Table S 3. Overexpression systems.**

870 Abbreviations: Amp, Ampicillin; Kan, Kamamycin; LA, lipoic acid

| Protein  | <i>E. coli</i> | Vector                       | Antibiotics                                                | Induction                | Medium | °C |
|----------|----------------|------------------------------|------------------------------------------------------------|--------------------------|--------|----|
| H        | BL21(DE3)      | pET28a                       | 50 µg ml <sup>-1</sup> Kan                                 | 1 mM IPTG,<br>0.24 mM LA | 2YT    | 30 |
| T plus H | BL21(DE3)      | pET-DUET1 (T),<br>pET28a (H) | 100 µg ml <sup>-1</sup> Amp,<br>50 µg ml <sup>-1</sup> Kan | 1 mM IPTG,<br>0.24 mM LA | 2YT    | 25 |
| L        | LMG194         | pBAD/HisA                    | 100 µg ml <sup>-1</sup> Amp                                | 0.02% (w/v)<br>Arabinose | 2YT    | 30 |
| P        | LMG194         | pBAD/HisA                    | 100 µg ml <sup>-1</sup> Amp                                | 0.02% (w/v)<br>Arabinose | 2YT    | 30 |

871

872

873 **Figure S 1. Design of the QconCAT protein.**

874 Suitable peptides were identified by analysis of LC-MS<sup>E</sup> data from tryptic digests of mitochondrial  
875 matrix proteins. Two peptides per protein were selected. For the isoforms of the Arabidopsis L-, P-  
876 and H-proteins, one peptide was isoform-specific while the second peptide was specific for both  
877 isoforms. The flanking sequences of the peptides derive from the native proteins. Peptides of rabbit  
878 phosphorylase B were incorporated at both ends to enable quantification of the QconCAT amount  
879 via a synthetic Hi3 Phos B standard.

MGASGK<sup>V</sup>LYPNDNFFEGKASGKAGR<sup>T</sup>PFTSGLNLDK<sup>I</sup>IGVAGR<sup>T</sup>PFTSGLDLEK<sup>I</sup>IG  
PhosB (1) L Pea (1) L1/L2 Arath

VNSRAK<sup>A</sup>IDNAEGLVK<sup>I</sup>IANSRAK<sup>A</sup>IDTAEGMVK<sup>I</sup>LAPGR<sup>I</sup>IGVSV<sup>D</sup>SSGK<sup>Q</sup>ALR  
L Pea (2) / L1 Arath L2 Arath P Pea (1) / P2 Arath

MAMPGR<sup>I</sup>IGISV<sup>D</sup>SSGK<sup>Q</sup>ALRMAMASK<sup>I</sup>AILNANYMAK<sup>R</sup>LENEK<sup>G</sup>GAI<sup>D</sup>DDSVITK<sup>I</sup>  
P1 Arath P Pea (2) / P1/P2 Arath T Pea (1) / T Arath (1)

VTDIRR<sup>V</sup>GFISSGPPR<sup>S</sup>HSIRR<sup>V</sup>GF<sup>F</sup>SSGPPAR<sup>S</sup>HSGLK<sup>Y</sup>APSHEWVK<sup>H</sup>HEGGLK  
T Pea (2) T Arath (2) H Pea (1)

<sup>Y</sup>ANSHEWVK<sup>H</sup>HEGMIK<sup>I</sup>KPTSPDELESLLGAKE<sup>Y</sup>TMIK<sup>V</sup>KPSSPAELES<sup>L</sup>MGPK<sup>E</sup>Y  
H1/H3 Arath H Pea (2) H1 Arath

TMIK<sup>V</sup>KPSSPAELES<sup>L</sup>MGPK<sup>E</sup>Y<sup>T</sup>ASGK<sup>V</sup>FADYEEYVKASGKHHHHHH  
H3 Arath PhosB (2)

880

881

882 **Figure S 2. Base peak ion chromatogram of a tryptic digest of the QconCAT.**

883 The chromatogram displays all peptides included into the QconCAT.

884

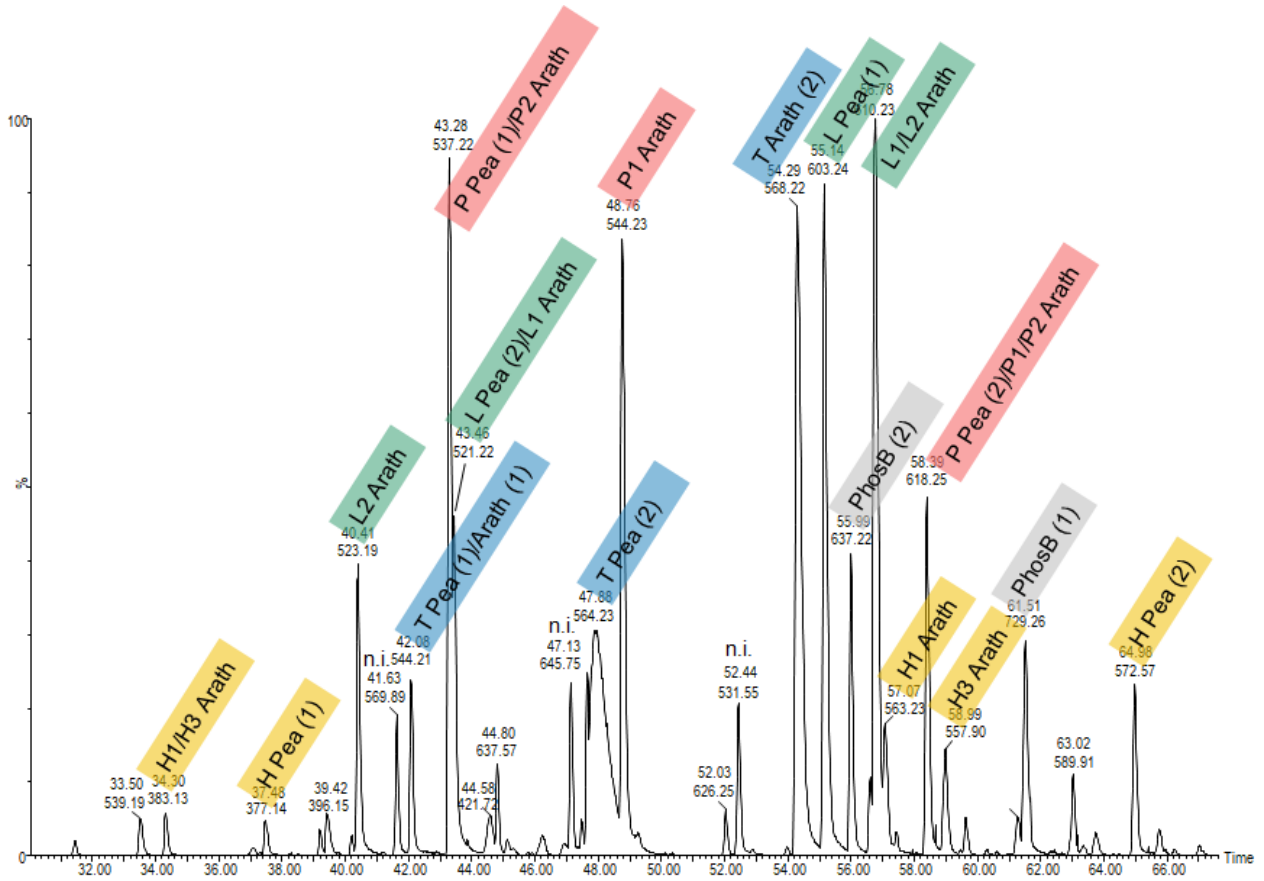

885

886

887 **Figure S 3. Alignment of the Arabidopsis H-protein isoforms GCS-H1 and GCS-H3 and the**  
888 **H-protein from pea.**

889 Amino acid sequences of the mature proteins after cleavage of the transit peptide are shown.  
890 Sequence differences are high-lighted and trypsin cleavage sites are labeled in red. The lipoyl-  
891 binding lysine is shown in green. The sequences provide only a small number of tryptic peptides,  
892 and a single detectable peptide is differentiating between the leaf mesophyll isoforms of  
893 Arabidopsis. Peptides selected for the QconCAT are underlined.

894

```
GCSH_PEA      S NVLDGLKYAPSHEWVKHEG SVATIGITDHAQDHLGEVVFVELPE PGVSV 5C
GCSH1_ARATH  S TVLEGLKYANSHEWVKHEG SVATIGITAHAQDHLGEVVFVELPE DNTSV 5C
GCSH3_ARATH  S SVLEGLKYANSHEWVKHEG SVATIGITDHAQDHLGEVVFVELPE ANSSV 5C

GCSH_PEA      TKGKGF GAVESV KATSDVNSPISGEVIEVNTGLTGKPGLINSSPYEDGWM 100
GCSH1_ARATH  S KEKSFGAVESV KATSEILSPISGEIIEVNKKLTES PGLINSSPYEDGWM 100
GCSH3_ARATH  S KEKSFGAVESV KATSEILSPISGEVIEVNTKLTES PGLINSSPYEDGWM 100

GCSH_PEA      I KIKPTSPDELESLLGAKKEYTKFCEEEDA AH 131
GCSH1_ARATH  I KVKPSSPAELESLMGPKKEYTKFCEEEDA AH 131
GCSH3_ARATH  I KVKPSSPAELEALMGPKKEYTKFCEEEDA AH 131
```

895

896
